# Supplementary material for: Danggui Shaoyao San ameliorates Alzheimer’s disease by regulating lipid metabolism and inhibiting neuronal ferroptosis through the AMPK/Sp1/ACSL4 signaling pathway
Source: Front Pharmacol. 2025 Apr 9;16:1588375. doi: 10.3389/fphar.2025.1588375 (PMC12014676; doi:10.3389/fphar.2025.1588375)
Supplement: Supplementary file 1 [file Table2.xlsx]

## Sheet: Sheet1
Inname	MOL ID	name	DBstru	DBsynon	CAS	pubchem_inf	pubCID	inchikey	OB	DL	MW	halflife	bbb	tpsa	rbn
FU LING	MOL000098	quercetin	https://old.tcmsp-e.com/strctpng/MOL000098.png	2-(3,4-dihydroxyphenyl)-3,5,7-trihydroxychromen-4-one|2-(3,4-dihydroxyphenyl)-3,5,7-trihydroxy-chromen-4-one|2-(3,4-dihydroxyphenyl)-3,5,7-trihydroxy-4-chromenone|2-(3,4-dihydroxyphenyl)-3,5,7-trihydroxy-chromone|73123-10-1|74893-81-5|117-39-5|C.I. natural yellow 10 & 13|NCIOpen2_007628|MixCom3_000183|NCIOpen2_007882|NCGC00025016-01|NCI60_042036|2-(3,4-Dihydroxy-phenyl)-3,5,7-trihydroxy-chromen-4…	73123-10-1|74893-81-5|117-39-5	pubchem_cid: 5280343|MOL_ID: MOL000098|molecule_ID: 98|molecule_name: quercetin|tpsa: 131.36|rbn: 1|inchikey: REFJWTPEDVJJIY-UHFFFAOYSA-N|ob: 46.4333481195|dl: 0.27525|bbb: -0.76890|caco2: 0.04842|mw: 302.250|hdon: 5|hacc: 7|alogp: 1.504|halflife: 14.400548|FASA: 0.38453352	5280343	REFJWTPEDVJJIY-UHFFFAOYSA-N	46.4333	0.27525	302.25	14.4005	-0.7689	131.36	1
DANG GUI|CHUAN XIONG	MOL000417	Calycosin	https://old.tcmsp-e.com/strctpng/MOL000417.png	7-hydroxy-3-(3-hydroxy-4-methoxyphenyl)chromen-4-one|7-hydroxy-3-(3-hydroxy-4-methoxy-phenyl)chromen-4-one|7-hydroxy-3-(3-hydroxy-4-methoxyphenyl)-4-chromenone|7-hydroxy-3-(3-hydroxy-4-methoxy-phenyl)chromone|20575-57-9|MLS000876988|SMR000440659|C01562|Calycosin|CHEBI:17793|ACon1_000650|MEGxp0_001325|7,3'-dihydroxy-4'-methoxyisoflavone	20575-57-9	pubchem_cid: 5280448|MOL_ID: MOL000417|molecule_ID: 417|molecule_name: Calycosin|tpsa: 79.9|rbn: 2|inchikey: ZZAJQOPSWWVMBI-UHFFFAOYSA-N|ob: 47.7518278266|dl: 0.24278|bbb: -0.42774|caco2: 0.52379|mw: 284.280|hdon: 2|hacc: 5|alogp: 2.316|halflife: 17.096724|FASA: 0	5280448	ZZAJQOPSWWVMBI-UHFFFAOYSA-N	47.7518	0.24278	284.28	17.0967	-0.42774	79.9	2
DANG GUI|BAI SHAO	MOL001454	berberine	https://old.tcmsp-e.com/strctpng/MOL001454.png	berberine	633-66-9|2086-83-1	pubchem_cid: |MOL_ID: MOL001454|molecule_ID: 1454|molecule_name: berberine|tpsa: 40.8|rbn: 2|inchikey: OJDYKDYYXBXBIX-UHFFFAOYSA-N|ob: 36.8612450372|dl: 0.77665|bbb: 0.56718|caco2: 1.24179|mw: 336.390|hdon: 0|hacc: 4|alogp: 3.447|halflife: 6.565936|FASA: 0.19133656		OJDYKDYYXBXBIX-UHFFFAOYSA-N	36.8612	0.77665	336.39	6.56594	0.56718	40.8	2
CHUAN XIONG|DANG GUI	MOL000433	Folic acid	https://old.tcmsp-e.com/strctpng/MOL000433.png	(2S)-2-[[4-[(2-amino-4-oxo-1H-pteridin-6-yl)methylamino]benzoyl]amino]pentanedioic acid|(2S)-2-[[[4-[(2-amino-4-oxo-1H-pteridin-6-yl)methylamino]phenyl]-oxomethyl]amino]pentanedioic acid|(2S)-2-[[4-[(2-amino-4-keto-1H-pteridin-6-yl)methylamino]benzoyl]amino]glutaric acid|(2S)-2-[[4-[(2-amino-4-oxo-1H-pteridin-6-yl)methylamino]phenyl]carbonylamino]pentanedioic acid|33609-88-0|59-30-3|N-(4-{[(2-ami…	33609-88-0|59-30-3	pubchem_cid: 6037|MOL_ID: MOL000433|molecule_ID: 433|molecule_name: FA|tpsa: 213.28|rbn: 9|inchikey: OVBPIULPVIDEAO-LBPRGKRZSA-N|ob: 68.9604362164|dl: 0.7057|bbb: -2.58743|caco2: -1.50099|mw: 441.450|hdon: 7|hacc: 13|alogp: 0.007|halflife: 24.811237|FASA: 0	6037	OVBPIULPVIDEAO-LBPRGKRZSA-N	68.9604	0.7057	441.45	24.8112	-2.58743	213.28	9
DANG GUI|BAI SHAO|BAI ZHU|CHUAN XIONG	MOL000358	beta-sitosterol	https://old.tcmsp-e.com/strctpng/MOL000358.png	(3S,8S,9S,10R,13R,14S,17R)-17-[(2R,5R)-5-ethyl-6-methylheptan-2-yl]-10,13-dimethyl-2,3,4,7,8,9,11,12,14,15,16,17-dodecahydro-1H-cyclopenta[a]phenanthren-3-ol|(3S,8S,9S,10R,13R,14S,17R)-17-[(1R,4R)-4-ethyl-1,5-dimethyl-hexyl]-10,13-dimethyl-2,3,4,7,8,9,11,12,14,15,16,17-dodecahydro-1H-cyclopenta[a]phenanthren-3-ol|(3S,8S,9S,10R,13R,14S,17R)-17-[(1R,4R)-4-ethyl-1,5-dimethylhexyl]-10,13-dimethyl-2,3…	83-46-5	pubchem_cid: 222284|MOL_ID: MOL000358|molecule_ID: 358|molecule_name: beta-sitosterol|tpsa: 20.23|rbn: 6|inchikey: KZJWDPNRJALLNS-VJSFXXLFSA-N|ob: 36.9139058327|dl: 0.75123|bbb: 0.98588|caco2: 1.32463|mw: 414.790|hdon: 1|hacc: 1|alogp: 8.084|halflife: 5.355491|FASA: 0.22550575	222284	KZJWDPNRJALLNS-VJSFXXLFSA-N	36.9139	0.75123	414.79	5.35549	0.98588	20.23	6
FU LING|BAI ZHU	MOL001002	ellagic acid	https://old.tcmsp-e.com/strctpng/MOL001002.png	476-66-4|KBioSS_001674|Spectrum_001194|SBB006501|NSC656272|Oprea1_032884|AIDS002688|SDCCGMLS-0066664.P001|KBioGR_001080|SPECTRUM1502245|Spectrum5_000959|SMP1_000111|KBio2_001674|4,4&#8242;,5,5&#8242;,6,6&#8242;-Hexahydroxydiphenic acid 2,6,2&#8242;,6&#8242;-dilactone|E2250_SIGMA|MLS000069632|KBio2_006810|Polyphenolic|NCI60_003869|KBio2_004242|MLS-0066664.0001|BSPBio_002950|TNP00132|C10788|Ellagic…	476-66-4	pubchem_cid: |MOL_ID: MOL001002|molecule_ID: 1002|molecule_name: ellagic acid|tpsa: 141.34|rbn: 0|inchikey: AFSDNFLWKVMVRB-UHFFFAOYSA-N|ob: 43.0645585827|dl: 0.43417|bbb: -1.41189|caco2: -0.44261|mw: 302.200|hdon: 4|hacc: 8|alogp: 1.483|halflife: -1.040645|FASA: 0.43301627		AFSDNFLWKVMVRB-UHFFFAOYSA-N	43.0646	0.43417	302.2	-1.04065	-1.41189	141.34	0
DANG GUI|BAI ZHU	MOL000449	Stigmasterol	https://old.tcmsp-e.com/strctpng/MOL000449.png	(3S,8S,9S,10R,13R,14S,17R)-17-[(2R,5S)-5-ethyl-6-methylhept-3-en-2-yl]-10,13-dimethyl-2,3,4,7,8,9,11,12,14,15,16,17-dodecahydro-1H-cyclopenta[a]phenanthren-3-ol|(3S,8S,9S,10R,13R,14S,17R)-17-[(E,2R,5S)-5-ethyl-6-methylhept-3-en-2-yl]-10,13-dimethyl-2,3,4,7,8,9,11,12,14,15,16,17-dodecahydro-1H-cyclopenta[a]phenanthren-3-ol|(3S,8S,9S,10R,13R,14S,17R)-17-[(1R,4S)-4-ethyl-1,5-dimethyl-hex-2-enyl]-10,…	83-48-7	pubchem_cid: 5280794|MOL_ID: MOL000449|molecule_ID: 449|molecule_name: Stigmasterol|tpsa: 20.23|rbn: 5|inchikey: HCXVJBMSMIARIN-PHZDYDNGSA-N|ob: 43.8298515785|dl: 0.75665|bbb: 1.00045|caco2: 1.44458|mw: 412.770|hdon: 1|hacc: 1|alogp: 7.640|halflife: 5.574595|FASA: 0.21679397	5280794	HCXVJBMSMIARIN-PHZDYDNGSA-N	43.8299	0.75665	412.77	5.5746	1.00045	20.23	5
FU LING	MOL000292	poricoic acid C	https://old.tcmsp-e.com/strctpng/MOL000292.png	poricoic acid C	151200-89-4	pubchem_cid: 56668247|MOL_ID: MOL000292|molecule_ID: 292|molecule_name: poricoic acid C|tpsa: 74.6|rbn: 10|inchikey: QFVFCBZDUKVXLR-PKSIZLAPSA-N|ob: 38.1513578853|dl: 0.74643|bbb: -0.41341|caco2: 0.31611|mw: 482.770|hdon: 2|hacc: 4|alogp: 7.113|halflife: 7.725726|FASA: 0	56668247	QFVFCBZDUKVXLR-PKSIZLAPSA-N	38.1514	0.74643	482.77	7.72573	-0.41341	74.6	10
BAI SHAO	MOL000422	kaempferol	https://old.tcmsp-e.com/strctpng/MOL000422.png	3,5,7-trihydroxy-2-(4-hydroxyphenyl)chromen-4-one|3,5,7-trihydroxy-2-(4-hydroxyphenyl)-4-chromenone|3,5,7-trihydroxy-2-(4-hydroxyphenyl)chromone|520-18-3|ZINC00137345|Oprea1_650954|BSPBio_001176|NSC407289|4H-1-Benzopyran-4-one, 3,5,7-trihydroxy-2-(4-hydroxyphenyl)- (9CI)|Flavone, 3,4',5,7-tetrahydroxy- (7CI,8CI)|Kampcetin|Pelargidenon|nchembio.2007.28-comp30|3,4',5,7-Tetrahydroxyflavone|4H-1-Benz…	520-18-3	pubchem_cid: 5280863|MOL_ID: MOL000422|molecule_ID: 422|molecule_name: kaempferol|tpsa: 111.13|rbn: 1|inchikey: IYRMWMYZSQPJKC-UHFFFAOYSA-N|ob: 41.8822495352|dl: 0.24066|bbb: -0.55335|caco2: 0.26096|mw: 286.250|hdon: 4|hacc: 6|alogp: 1.771|halflife: 14.743371|FASA: 0	5280863	IYRMWMYZSQPJKC-UHFFFAOYSA-N	41.8822	0.24066	286.25	14.7434	-0.55335	111.13	1
BAI SHAO|DANG GUI|FU LING|CHUAN XIONG	MOL001924	paeoniflorin	https://old.tcmsp-e.com/strctpng/MOL001924.png	23180-57-6|C09959|Paeoniflorin|.beta.-D-Glucopyranoside, (1aR,2S,3aR,5R,5aR,5bS)-5b-[(benzoyloxy)methyl]tetrahydro-5-hydroxy-2-methyl-2,5-methano-1H-3,4-dioxacyclobuta[cd]pentalen-1a(2H)-yl|AIDS-002238|AIDS002238	23180-57-6	pubchem_cid: |MOL_ID: MOL001924|molecule_ID: 1924|molecule_name: paeoniflorin|tpsa: 164.37|rbn: 7|inchikey: YKRGDOXKVOZESV-WRJNSLSBSA-N|ob: 53.87037516|dl: 0.78709|bbb: -1.86121|caco2: -1.47259|mw: 480.510|hdon: 5|hacc: 11|alogp: -1.283|halflife: 13.882664|FASA: 0.34424013		YKRGDOXKVOZESV-WRJNSLSBSA-N	53.8704	0.78709	480.51	13.8827	-1.86121	164.37	7
FU LING|CHUAN XIONG	MOL002776	Baicalin	https://old.tcmsp-e.com/strctpng/MOL002776.png	(2S,3S,4S,5R,6S)-6-(5,6-dihydroxy-4-oxo-2-phenylchromen-7-yl)oxy-3,4,5-trihydroxyoxane-2-carboxylic acid|(2S,3S,4S,5R,6S)-6-(5,6-dihydroxy-4-oxo-2-phenyl-chromen-7-yl)oxy-3,4,5-trihydroxy-tetrahydropyran-2-carboxylic acid|(2S,3S,4S,5R,6S)-6-[(5,6-dihydroxy-4-oxo-2-phenyl-7-chromenyl)oxy]-3,4,5-trihydroxy-2-tetrahydropyrancarboxylic acid|(2S,3S,4S,5R,6S)-6-(5,6-dihydroxy-4-keto-2-phenyl-chromen-7-…	31564-28-0|100647-26-5|21967-41-9|27462-75-5	pubchem_cid: 64982|MOL_ID: MOL002776|molecule_ID: 2776|molecule_name: Baicalin|tpsa: 187.12|rbn: 4|inchikey: IKIIZLYTISPENI-ZFORQUDYSA-N|ob: 40.1236099599|dl: 0.75264|bbb: -1.74426|caco2: -0.84777|mw: 446.390|hdon: 6|hacc: 11|alogp: 0.639|halflife: 17.358993|FASA: 0.36380428	64982	IKIIZLYTISPENI-ZFORQUDYSA-N	40.1236	0.75264	446.39	17.359	-1.74426	187.12	4
DANG GUI|BAI SHAO	MOL001942	isoimperatorin	https://old.tcmsp-e.com/strctpng/MOL001942.png	4-(3-methylbut-2-enoxy)furo[3,2-g]chromen-7-one|4-(3-methylbut-2-enoxy)-7-furo[3,2-g]chromenone|482-45-1|Iso-imperatorin|Isoimperatorin|7H-Furo[3,2-g][1]benzopyran-7-one, 4-[(3-methyl-2-butenyl)oxy]-|7H-Furo[3,2-g][1]benzopyran-7-one, 4-((3-methyl-2-butenyl)oxy)-|AIDS-071126|AIDS071126|MLS001048978|MLS000574919|SMR000156243|STOCK1N-27740|ZINC00296185|MEGxp0_000090|ACon1_000176|Oprea1_630212|Oprea…	482-45-1	pubchem_cid: 68081|MOL_ID: MOL001942|molecule_ID: 1942|molecule_name: isoimperatorin|tpsa: 52.58|rbn: 3|inchikey: IGWDEVSBEKYORK-UHFFFAOYSA-N|ob: 45.4642467387|dl: 0.22524|bbb: 0.66379|caco2: 0.97234|mw: 270.300|hdon: 0|hacc: 4|alogp: 3.653|halflife: -1.441377|FASA: 0.27245414	68081	IGWDEVSBEKYORK-UHFFFAOYSA-N	45.4642	0.22524	270.3	-1.44138	0.66379	52.58	3
BAI SHAO	MOL003958	Evodiamine	https://old.tcmsp-e.com/strctpng/MOL003958.png	518-17-2|Evodiamine|ZINC00898159|BB_NC-1930|Evodiamine, <i>Evodia rutaecarpa|C09187	518-17-2	pubchem_cid: |MOL_ID: MOL003958|molecule_ID: 3958|molecule_name: Evodiamine|tpsa: 39.34|rbn: 0|inchikey: TXDUTHBFYKGSAH-SFHVURJKSA-N|ob: 86.01614999|dl: 0.6416|bbb: 0.85158|caco2: 1.49127|mw: 303.390|hdon: 1|hacc: 3|alogp: 3.668|halflife: 7.946339|FASA: 0.31834671		TXDUTHBFYKGSAH-SFHVURJKSA-N	86.0161	0.6416	303.39	7.94634	0.85158	39.34	0
BAI SHAO|DANG GUI	MOL004792	nodakenin	https://old.tcmsp-e.com/strctpng/MOL004792.png	(2R)-2-[2-[(2S,3R,4S,5S,6R)-3,4,5-trihydroxy-6-(hydroxymethyl)oxan-2-yl]oxypropan-2-yl]-2,3-dihydrofuro[3,2-g]chromen-7-one|(2R)-2-[1-methyl-1-[(2S,3R,4S,5S,6R)-3,4,5-trihydroxy-6-(hydroxymethyl)tetrahydropyran-2-yl]oxy-ethyl]-2,3-dihydrofuro[3,2-g]chromen-7-one|(2R)-2-[1-methyl-1-[[(2S,3R,4S,5S,6R)-3,4,5-trihydroxy-6-(hydroxymethyl)-2-tetrahydropyranyl]oxy]ethyl]-2,3-dihydrofuro[3,2-g]chromen-7-…	495-31-8	pubchem_cid: 73191|MOL_ID: MOL004792|molecule_ID: 4792|molecule_name: nodakenin|tpsa: 138.82|rbn: 4|inchikey: HXCGUCZXPFBNRD-DNLMCPORSA-N|ob: 57.1202369051|dl: 0.69281|bbb: -1.42157|caco2: -0.79035|mw: 408.440|hdon: 4|hacc: 9|alogp: 0.283|halflife: 7.161362|FASA: 0.27113909	73191	HXCGUCZXPFBNRD-DNLMCPORSA-N	57.1202	0.69281	408.44	7.16136	-1.42157	138.82	4
DANG GUI	MOL001659	Poriferasterol	https://old.tcmsp-e.com/strctpng/MOL001659.png	(3S,8S,9S,10R,13R,14S,17R)-17-[(E,2R,5R)-5-ethyl-6-methylhept-3-en-2-yl]-10,13-dimethyl-2,3,4,7,8,9,11,12,14,15,16,17-dodecahydro-1H-cyclopenta[a]phenanthren-3-ol|(3S,8S,9S,10R,13R,14S,17R)-17-[(E,1R,4R)-4-ethyl-1,5-dimethyl-hex-2-enyl]-10,13-dimethyl-2,3,4,7,8,9,11,12,14,15,16,17-dodecahydro-1H-cyclopenta[a]phenanthren-3-ol|(3S,8S,9S,10R,13R,14S,17R)-17-[(E,1R,4R)-4-ethyl-1,5-dimethylhex-2-enyl]…	481-16-3	pubchem_cid: 5281330|MOL_ID: MOL001659|molecule_ID: 1659|molecule_name: Poriferasterol|tpsa: 20.23|rbn: 5|inchikey: HCXVJBMSMIARIN-KEJCWXRGSA-N|ob: 43.8298515785|dl: 0.75596|bbb: 1.03472|caco2: 1.43659|mw: 412.770|hdon: 1|hacc: 1|alogp: 7.640|halflife: 5.341727|FASA: 0.21613795	5281330	HCXVJBMSMIARIN-KEJCWXRGSA-N	43.8299	0.75596	412.77	5.34173	1.03472	20.23	5
BAI SHAO|FU LING	MOL000492	(+)-catechin	https://old.tcmsp-e.com/strctpng/MOL000492.png	(2R,3S)-2-(3,4-dihydroxyphenyl)chroman-3,5,7-triol|154-23-4|159761-73-6|16198-00-8|321-01-7|4211-28-3|5323-80-8|7295-85-4|( -)-Catechin|(+)-(2R,3S)-5,7,3',4'-Tetrahydroxyflavan-3-ol|(+)-3',4',5,7-Tetrahydroxy-2,3-trans-flavan-3-ol|(+)-Cyanidanol|2H-Benzopyran-3,5,7-triol, 2-(3,4-dihydroxyphenyl)-3,4-dihydro-, (2R,3S)-|AI3-22757|Biocatechin|CCRIS 6855|Cianidanol [INN:JAN]|Cianidanolum [INN-Latin]|…	154-23-4|159761-73-6|16198-00-8|321-01-7|4211-28-3|5323-80-8|7295-85-4	pubchem_cid: 9064|MOL_ID: MOL000492|molecule_ID: 492|molecule_name: (+)-catechin|tpsa: 110.38|rbn: 1|inchikey: PFTAWBLQPZVEMU-DZGCQCFKSA-N|ob: 54.8264340523|dl: 0.24164|bbb: -0.72733|caco2: -0.03424|mw: 290.290|hdon: 5|hacc: 6|alogp: 1.920|halflife: 0.609577|FASA: 0	9064	PFTAWBLQPZVEMU-DZGCQCFKSA-N	54.8264	0.24164	290.29	0.609577	-0.72733	110.38	1
BAI SHAO|DANG GUI	MOL001941	Ammidin	https://old.tcmsp-e.com/strctpng/MOL001941.png	9-(3-methylbut-2-enoxy)furo[3,2-g]chromen-7-one|9-(3-methylbut-2-enoxy)-7-furo[3,2-g]chromenone|482-44-0|70102-00-0|Spectrum_000755|Spectrum4_001422|5-Benzofuranacrylic acid, 6-hydroxy-7-((3-methyl-2-butenyl)oxy)-, delta-lactone|6-Hydroxy-7-(3-methyl-2-butenyloxy)-5-benzofuranacrylic acid omega-lactone|7H-Furo(3,2-g)(1)benzopyran-7-one, 9-((3-methyl-2-butenyl)oxy)-|8-Isoamylenoxypsoralen|8-Isopen…	482-44-0|70102-00-0	pubchem_cid: 10212|MOL_ID: MOL001941|molecule_ID: 1941|molecule_name: Ammidin|tpsa: 52.58|rbn: 3|inchikey: OLOOJGVNMBJLLR-UHFFFAOYSA-N|ob: 34.5485639384|dl: 0.22355|bbb: 0.91694|caco2: 1.12720|mw: 270.300|hdon: 0|hacc: 4|alogp: 3.653|halflife: -1.354981|FASA: 0.28223461	10212	OLOOJGVNMBJLLR-UHFFFAOYSA-N	34.5486	0.22355	270.3	-1.35498	0.91694	52.58	3
DANG GUI	MOL004780	Angelicone	https://old.tcmsp-e.com/strctpng/MOL004780.png	5,7-dimethoxy-8-(3-methylbut-2-enoyl)chromen-2-one|5,7-dimethoxy-8-(3-methyl-1-oxobut-2-enyl)-2-chromenone|5,7-dimethoxy-8-(3-methylbut-2-enoyl)coumarin|MLS000574874|SMR000156205|5,7-Dimethoxy-8-(3-methyl-2-butenoyl)-2H-chromen-2-one|5,7-Dimethoxy-8-(3-methyl-2-butenoyl)-2-oxo-2H-chromene|Angelicone		pubchem_cid: 616303|MOL_ID: MOL004780|molecule_ID: 4780|molecule_name: Angelicone|tpsa: 65.74|rbn: 4|inchikey: JEDBBFHVVHKMKS-UHFFFAOYSA-N|ob: 30.989173964|dl: 0.188|bbb: 0.37707|caco2: 0.39612|mw: 288.320|hdon: 0|hacc: 5|alogp: 3.153|halflife: 15.931788|FASA: 0.25799209	616303	JEDBBFHVVHKMKS-UHFFFAOYSA-N	30.9892	0.188	288.32	15.9318	0.37707	65.74	4
DANG GUI	MOL008647	Moupinamide	https://old.tcmsp-e.com/strctpng/MOL008647.png	3-(4-hydroxy-3-methoxyphenyl)-N-[2-(4-hydroxyphenyl)ethyl]prop-2-enamide|(E)-3-(4-hydroxy-3-methoxyphenyl)-N-[2-(4-hydroxyphenyl)ethyl]prop-2-enamide|3-(4-hydroxy-3-methoxy-phenyl)-N-[2-(4-hydroxyphenyl)ethyl]prop-2-enamide|(E)-3-(4-hydroxy-3-methoxy-phenyl)-N-[2-(4-hydroxyphenyl)ethyl]prop-2-enamide|3-(4-hydroxy-3-methoxy-phenyl)-N-[2-(4-hydroxyphenyl)ethyl]acrylamide|(E)-3-(4-hydroxy-3-methoxy-…	66648-43-9|65646-26-6	pubchem_cid: 5280537|MOL_ID: MOL008647|molecule_ID: 8647|molecule_name: Moupinamide|tpsa: 78.79|rbn: 6|inchikey: NPNNKDMSXVRADT-WEVVVXLNSA-N|ob: 86.7121590747|dl: 0.26454|bbb: -0.50741|caco2: 0.54599|mw: 313.380|hdon: 3|hacc: 5|alogp: 2.859|halflife: 3.712293|FASA: 0.32847375	5280537	NPNNKDMSXVRADT-WEVVVXLNSA-N	86.7122	0.26454	313.38	3.71229	-0.50741	78.79	6
FU LING|DANG GUI	MOL001506	Supraene	https://old.tcmsp-e.com/strctpng/MOL001506.png	2,6,10,15,19,23-Hexamethyltetracosa-2,6,10,14,18,22-hexaene|(6E,10E,14E,18E)-2,6,10,15,19,23-hexamethyltetracosa-2,6,10,14,18,22-hexaene|(14E)-2,6,10,15,19,23-hexamethyltetracosa-2,6,10,14,18,22-hexaene|111-02-4|94016-35-0|7683-64-9|Supraene|NSC93748|S3626_SIGMA|2,6,10,14,18,22-Tetracosahexaene, 2,6,10,15,19,23-hexamethyl-|(E,E,E,E)-Squalene|2,6,10,14,18,22-Tetracosahexaene, 2,6,10,15,19,23-hexam…	111-02-4|94016-35-0|7683-64-9	pubchem_cid: 638072|MOL_ID: MOL001506|molecule_ID: 1506|molecule_name: Supraene|tpsa: 0|rbn: 15|inchikey: YYGNTYWPHWGJRM-AAJYLUCBSA-N|ob: 33.5459426365|dl: 0.42161|bbb: 1.73017|caco2: 2.08183|mw: 410.800|hdon: 0|hacc: 0|alogp: 11.331|halflife: 2.721453|FASA: 0.27038652	638072	YYGNTYWPHWGJRM-AAJYLUCBSA-N	33.5459	0.42161	410.8	2.72145	1.73017	0	15
