# Supplementary material for: Danggui Shaoyao San ameliorates Alzheimer’s disease by regulating lipid metabolism and inhibiting neuronal ferroptosis through the AMPK/Sp1/ACSL4 signaling pathway
Source: Front Pharmacol. 2025 Apr 9;16:1588375. doi: 10.3389/fphar.2025.1588375 (PMC12014676; doi:10.3389/fphar.2025.1588375)
Supplement: Supplementary file 7 [file Table1.xlsx]

## Sheet: Sheet1
ID	name	mz	rt	exact_mass	ppm	formula	precursor_type	class	sub_class	KEGG	KEGG_Pathway	CAS	hmdb	library	level	posneg	DGSYS1	DGSYS2	DGSYS3	DGSYS4	DGSYS5	DGSYS6
M174T128	2-Oxoarginine	174.092	128	173.08	25.4125	C6H11N3O3	[M+H]+	Carboxylic acids and derivatives	Alpha-keto acids and derivatives	C03771	Amino acid metabolism; Global and overview maps	3715-10-4	HMDB0004225	MetaDNA	2	pos	1.86274e+07	1.44807e+07	1.26798e+07	1.56593e+07	1.62642e+07	1.70499e+07
M229T51	D-Octopine	229.131	50.8	246.133	24.1527	C9H18N4O4	[M+H-H2O]+	Carboxylic acids and derivatives	Amines	C04137	Amino acid metabolism; Membrane transport	34522-32-2		MetaDNA	2	pos	8.42438e+07	1.03145e+08	1.27796e+08	1.0233e+08	1.16966e+08	1.1465e+08
M151T417	Homogentisic acid	151.038	416.6	168.042	22.0744	C8H8O4	[M+H-H2O]+	Benzene and substituted derivatives	1-hydroxy-2-unsubstituted benzenoids	C00544	Amino acid metabolism; Metabolism of cofactors and vitamins; Xenobiotics biodegradation and metabolism; Global and overview maps	451-13-8	HMDB0000130	MetaDNA	2	pos	3.30376e+07	2.5154e+07	2.52153e+07	3.03909e+07	2.9753e+07	2.90757e+07
M507T341	Limonoate	507.223	341.4	506.215	1.23023	C26H34O10	[M+H]+	Carboxylic acids and derivatives	Alcohols and polyols	C01593				MetaDNA	2	pos	7.14222e+06	8.25324e+06	6.51285e+06	6.8866e+06	4.11344e+06	6.66904e+06
M211T364	Traumatic acid	211.134	363.9	228.136	23.3696	C12H20O4	[M+H-H2O]+	Carboxylic acids and derivatives	Carbonyl compounds	C16308	Lipid metabolism; Global and overview maps	6402-36-4	HMDB0000933	MetaDNA	2	pos	1.84201e+07	1.58566e+07	2.02391e+07	2.10639e+07	1.58286e+07	1.62319e+07
M395T581	Poriferasterol	395.369	580.5	412.37	15.7678	C29H48O	[M+H-H2O]+	Organooxygen compounds	Alcohols and polyols	C08836		481-16-3		MetaDNA	2	pos	1.88608e+07	1.03088e+08	5.77574e+06	2.52011e+07	4.28449e+07	6.44731e+07
M331T281	Radiatin	331.16	280.7	348.157	29.6965	C19H24O6	[M+H-H2O]+	Carboxylic acids and derivatives	Alcohols and polyols	C09539		25873-31-8		MetaDNA	2	pos	1.38007e+07	1.1605e+07	8.69904e+06	1.43303e+07	1.40659e+07	1.46924e+07
M101T680	Methylmalonic acid	101.072	679.8	118.027	3.68838	C4H6O4	[M+H-H2O]+	Carboxylic acids and derivatives	Dicarboxylic acids and derivatives	C02170	Carbohydrate metabolism; Amino acid metabolism; Global and overview maps; Nucleotide metabolism	516-05-2	HMDB0000202	BioDeepDB	2	pos	3.35754e+07	2.11042e+07	6.14999e+06	3.05215e+07	3.05576e+07	7.99305e+06
M103T220	gamma-Aminobutyric acid	103.055	219.7	103.063	13.619	C4H9NO2	[M]+	Carboxylic acids and derivatives	Amino acids, peptides, and analogues	C00334	Metabolism of cofactors and vitamins; Metabolism of other amino acids; Signal transduction; Nervous system; Sensory system; Endocrine system; Carbohydrate metabolism; Signaling molecules and interaction; Amino acid metabolism; Cellular community - prokaryotes; Global and overview maps	56-12-2	HMDB0000112	BioDeepDB	2	pos	6.33266e+06	5.86947e+06	4.71563e+06	5.9679e+06	5.50646e+06	6.63494e+06
M109T310	m-Cresol	109.102	310.1	108.058	1.26779	C7H8O	[M+H]+	Phenols	Cresols	C01467	Xenobiotics biodegradation and metabolism; Global and overview maps	108-39-4	HMDB0002048	BioDeepDB	2	pos	6.28092e+07	5.68032e+07	5.22058e+07	5.52857e+07	5.63247e+07	6.07735e+07
M110T454	Hydroquinone	110.021	453.6	110.037	0.0751147	C6H6O2	[M]+	Phenols	Benzenediols	C00530	Amino acid metabolism; Xenobiotics biodegradation and metabolism; Global and overview maps	123-31-9	HMDB0002434	BioDeepDB	2	pos	3.88949e+08	4.05061e+08	4.99195e+08	4.79258e+08	8.51549e+07	2.49509e+08
M111T535	Pyrrole-2-carboxylic acid	111.021	534.7	111.032	3.23558	C5H5NO2	[M]+	Pyrroles	Pyrrole carboxylic acids and derivatives	C05942	Amino acid metabolism	634-97-9	HMDB0004230	BioDeepDB	2	pos	1.78919e+08	5.40707e+07	1.67458e+08	5.09644e+07	2.86271e+08	5.51006e+07
M112T53	Cytosine	112.051	52.7	111.043	1.22357	C4H5N3O	[M+H]+	Diazines	Pyrimidines and pyrimidine derivatives	C00380	Global and overview maps; Nucleotide metabolism	71-30-7	HMDB0000630	BioDeepDB	2	pos	2.61088e+08	2.74497e+08	2.29934e+08	2.88269e+08	2.77603e+08	2.71532e+08
M113T74	Uracil	113.035	73.8	112.027	2.7494	C4H4N2O2	[M+H]+	Diazines	Pyrimidines and pyrimidine derivatives	C00106	Metabolism of cofactors and vitamins; Metabolism of other amino acids; Global and overview maps; Nucleotide metabolism	66-22-8	HMDB0000300	BioDeepDB	2	pos	7.44127e+07	7.24679e+07	7.63664e+07	7.37836e+07	8.06982e+07	7.79645e+07
M131T462	Ketoleucine	131.086	461.9	130.063	27.7678	C6H10O3	[M+H]+	Keto acids and derivatives	Short-chain keto acids and derivatives	C00233	Amino acid metabolism; Biosynthesis of other secondary metabolites; Global and overview maps	816-66-0	HMDB0000695	BioDeepDB	2	pos	5.25582e+07	4.25038e+07	4.14269e+07	4.50342e+07	4.28611e+07	4.7593e+07
M114T69	2-Heptanone	113.964	68.9	114.105	3.00162	C7H14O	[M]+	Organooxygen compounds	Carbonyl compounds	C08380		110-43-0	HMDB0003671	BioDeepDB	2	pos	5.64082e+07	1.20539e+08	6.76762e+07	1.16678e+08	1.19448e+08	7.22736e+07
M116T220	L-Proline	116.072	219.8	115.063	4.6993	C5H9NO2	[M+H]+	Carboxylic acids and derivatives	Amino acids, peptides, and analogues	C00148	Cancer: overview; Membrane transport; Digestive system; Biosynthesis of other secondary metabolites; Translation; Amino acid metabolism; Global and overview maps	147-85-3	HMDB0000162	BioDeepDB	2	pos	7.53255e+07	1.26559e+08	1.1541e+07	4.84374e+07	5.38329e+07	5.4712e+07
M118T568	Betaine	118.087	568.2	117.079	0.15381	C5H11NO2	[M+H]+	Carboxylic acids and derivatives	Amino acids, peptides, and analogues	C00719	Amino acid metabolism; Membrane transport; Global and overview maps	107-43-7 / 590-46-5	HMDB0000043	BioDeepDB	2	pos	1.39593e+07	3.74846e+07	6.5386e+07	4.68139e+07	7.55925e+07	9.98747e+07
M137T263	Phenylacetic acid	137.061	263	136.052	6.74154	C8H8O2	[M+H]+	Benzene and substituted derivatives		C07086	Amino acid metabolism; Xenobiotics biodegradation and metabolism; Global and overview maps	103-82-2	HMDB0000209	BioDeepDB	2	pos	4.04638e+07	1.08818e+07	8.69306e+06	5.23986e+07	5.01759e+07	4.91056e+07
M120T51	L-Threonine	120.066	50.8	119.058	3.8882	C4H9NO3	[M+H]+	Carboxylic acids and derivatives	Amino acids, peptides, and analogues	C00188	Metabolism of cofactors and vitamins; Membrane transport; Digestive system; Biosynthesis of other secondary metabolites; Translation; Amino acid metabolism; Chemical structure transformation maps; Global and overview maps	72-19-5	HMDB0000167	BioDeepDB	2	pos	2.01995e+08	2.29139e+08	2.05392e+08	2.31317e+08	2.44361e+08	2.54396e+08
M121T551	4-Hydroxystyrene	121.029	551.2	120.058	4.79208	C8H8O	[M+H]+	Benzene and substituted derivatives	Styrenes	C05627	Biosynthesis of other secondary metabolites	2628-17-3	HMDB0004072	BioDeepDB	2	pos	2.82011e+07	1.99506e+07	2.58405e+07	2.00735e+07	2.3568e+07	3.32287e+07
M124T208	Nicotinic acid	124.04	207.9	123.032	0.536219	C6H5NO2	[M+H]+	Pyridines and derivatives	Pyridinecarboxylic acids and derivatives	C00253	Metabolism of cofactors and vitamins; Biosynthesis of other secondary metabolites; Infectious disease: bacterial; Chemical structure transformation maps; Global and overview maps	59-67-6	HMDB0001488	BioDeepDB	2	pos	7.4216e+07	1.26871e+08	7.34943e+07	7.44119e+07	5.09159e+07	6.24166e+07
M140T427	Phosphonoacetate	139.988	427	139.988	2.85739	C2H5O5P	[M]+	Organic phosphonic acids and derivatives	Organic phosphonic acids	C05682	Metabolism of other amino acids; Global and overview maps	4408-78-0	HMDB0004110	BioDeepDB	2	pos	3.7283e+07	8.29306e+06	7.28488e+06	7.68365e+06	2.80753e+07	4.03393e+07
M124T689_2	3-Hydroxybenzyl alcohol glucoside	124.088	688.7	124.052	6.32963	C7H8O2	[M]+	Organooxygen compounds	Carbohydrates and carbohydrate conjugates	C03351	Xenobiotics biodegradation and metabolism; Global and overview maps	143995-98-6 / 620-24-6	HMDB0038331	BioDeepDB	2	pos	1.58597e+09	1.56709e+09	1.92339e+09	2.11482e+09	2.77047e+09	9.30189e+09
M130T74	Pipecolic acid	130.05	74.2	129.079	24.1192	C6H11NO2	[M+H]+	Carboxylic acids and derivatives	Amino acids, peptides, and analogues	C00408	Chemical structure transformation maps; Amino acid metabolism; Biosynthesis of other secondary metabolites; Global and overview maps	535-75-1 / 3105-95-1	HMDB0000070	BioDeepDB	2	pos	9.60746e+08	1.02657e+09	1.08333e+09	1.07542e+09	1.10523e+09	1.253e+09
M130T668	Heptanoic acid	130.16	668.1	130.099	3.89282	C7H14O2	[M]+	Fatty Acyls	Fatty acids and conjugates	C17714		111-14-8	HMDB0000666	BioDeepDB	2	pos	1.05033e+07	2.64898e+07	4.49745e+06	4.67865e+06	3.31762e+07	2.28039e+07
M132T193	Glutaric acid	132.102	193.3	132.042	0.050269	C5H8O4	[M]+	Carboxylic acids and derivatives	Dicarboxylic acids and derivatives	C00489	Lipid metabolism; Amino acid metabolism; Global and overview maps	110-94-1	HMDB0000661	BioDeepDB	2	pos	1.61402e+07	2.26268e+07	3.17635e+07	2.01089e+07	2.02352e+07	1.53792e+07
M132T117	cis-4-Hydroxy-D-proline	131.975	116.8	131.058	4.16764	C5H9NO3	[M+H]+	Carboxylic acids and derivatives	Amino acids, peptides, and analogues	C03440	Amino acid metabolism; Global and overview maps	2584-71-6	HMDB0060460	BioDeepDB	2	pos	8.03526e+06	1.01634e+07	3.52716e+07	8.52396e+07	1.91486e+07	9.77811e+06
M133T525	L-Asparagine	133.101	525.2	132.054	3.6452	C4H8N2O3	[M+H]+	Carboxylic acids and derivatives	Amino acids, peptides, and analogues	C00152	Cancer: overview; Metabolism of other amino acids; Digestive system; Translation; Amino acid metabolism; Chemical structure transformation maps; Global and overview maps	2058-58-4	HMDB0033780	BioDeepDB	2	pos	1.44388e+07	3.05258e+06	6.94023e+06	2.509e+06	986502	3.03353e+06
M155T419	L-Histidine	154.99	419.2	155.07	7.87808	C6H9N3O2	[M]+	Carboxylic acids and derivatives	Amino acids, peptides, and analogues	C00135	Cancer: overview; Membrane transport; Metabolism of other amino acids; Digestive system; Biosynthesis of other secondary metabolites; Translation; Amino acid metabolism; Chemical structure transformation maps; Global and overview maps	71-00-1	HMDB0000177	BioDeepDB	2	pos	8.82504e+08	2.41701e+08	1.47404e+09	4.22652e+08	6.95044e+08	1.5823e+09
M142T188	O-Phosphoethanolamine	141.959	187.9	141.019	3.13123	C2H8NO4P	[M+H]+	Organic phosphoric acids and derivatives	Phosphate esters	C00346	Lipid metabolism; Signal transduction; Global and overview maps; Drug resistance: antimicrobial	1071-23-4	HMDB0000224	BioDeepDB	2	pos	2.76424e+07	6.44681e+06	1.21777e+08	2.40626e+07	2.53649e+07	2.81872e+07
M158T672	Pelargonic acid	158.154	671.7	158.131	0.759763	C9H18O2	[M]+	Fatty Acyls	Fatty acids and conjugates	C01601		112-05-0	HMDB0000847	BioDeepDB	2	pos	7.60456e+06	1.54638e+07	2.90685e+06	3.21272e+06	3.63556e+06	1.69477e+07
M145T671	3-Hydroxymethylglutaric acid	145.049	670.6	162.053	27.1218	C6H10O5	[M+H-H2O]+	Fatty Acyls	Fatty acids and conjugates	C03761		503-49-1	HMDB0000355	BioDeepDB	2	pos	7.34683e+07	9.88527e+07	8.58517e+07	1.61755e+07	2.03162e+07	2.86008e+07
M147T45	L-Lysine	147.113	45.4	146.106	1.66967	C6H14N2O2	[M+H]+	Carboxylic acids and derivatives	Amino acids, peptides, and analogues	C00047	Metabolism of cofactors and vitamins; Digestive system; Biosynthesis of other secondary metabolites; Translation; Amino acid metabolism; Chemical structure transformation maps; Global and overview maps	56-87-1	HMDB0000182	BioDeepDB	2	pos	8.24797e+07	1.03615e+08	8.56692e+07	1.04518e+08	9.04413e+07	8.63519e+07
M151T681	L-Arabinose	151.098	681.3	150.053	13.6522	C5H10O5	[M+H]+	Organooxygen compounds	Carbohydrates and carbohydrate conjugates	C00259	Carbohydrate metabolism; Membrane transport; Global and overview maps	5328-37-0 / 147-81-9 / 87-72-9	HMDB0000646	BioDeepDB	2	pos	4.49802e+07	1.23845e+07	1.03701e+07	1.75952e+07	7.59928e+07	1.03657e+08
M135T245	Perillyl alcohol	135.117	244.7	152.12	2.9604	C10H16O	[M+H-H2O]+	Prenol lipids	Monoterpenoids	C02452	Global and overview maps; Metabolism of terpenoids and polyketides	536-59-4/18457-55-1	HMDB0003634	BioDeepDB	2	pos	4.10544e+07	3.45824e+07	3.13859e+07	3.5052e+07	3.37353e+07	3.45249e+07
M153T476	D-Xylitol	153.078	476.1	152.069	11.6759	C5H12O5	[M+H]+	Organooxygen compounds	Carbohydrates and carbohydrate conjugates	C00379	Carbohydrate metabolism; Membrane transport; Global and overview maps	87-99-0	HMDB0002917	BioDeepDB	2	pos	5.87999e+06	2.82573e+07	6.80601e+06	9.56405e+07	3.23334e+07	2.27506e+07
M155T494	2,3-Butanediol	154.99	494	154.012	3.08735	C4H10O2S2	[M+H]+	Organooxygen compounds	Alcohols and polyols	C00265		513-85-9 / 3483-12-3	HMDB0003156	BioDeepDB	2	pos	9.33788e+08	5.10604e+09	4.73665e+08	5.0171e+08	4.13717e+08	3.79312e+08
M175T94	L-Arginine	175.119	93.9	174.112	0.954753	C6H14N4O2	[M+H]+	Carboxylic acids and derivatives	Amino acids, peptides, and analogues	C00062	Cancer: overview; Membrane transport; Neurodegenerative disease; Biosynthesis of other secondary metabolites; Translation; Amino acid metabolism; Chemical structure transformation maps; Infectious disease: parasitic; Global and overview maps	74-79-3	HMDB0000517	BioDeepDB	2	pos	1.64931e+08	2.30994e+08	1.30046e+08	1.58544e+08	1.69175e+08	1.74851e+08
M170T55	Pyridoxine	170.082	55.4	169.074	2.57561	C8H11NO3	[M+H]+	Pyridines and derivatives	Pyridoxines	C00314	Metabolism of cofactors and vitamins; Global and overview maps	65-23-6	HMDB0000239	BioDeepDB	2	pos	3.2141e+07	3.85525e+07	3.338e+07	3.12272e+07	4.81108e+07	3.65599e+07
M195T301	trans-Ferulic acid	195.066	300.7	194.058	5.13071	C10H10O4	[M+H]+	Cinnamic acids and derivatives	Hydroxycinnamic acids and derivatives	C01494	Chemical structure transformation maps; Biosynthesis of other secondary metabolites; Global and overview maps	537-98-4 / 1135-24-6	HMDB0000954	BioDeepDB	2	pos	2.21216e+08	1.77074e+08	1.74307e+08	1.97532e+08	1.88778e+08	2.11357e+08
M182T46	Galactitol	182.093	46.2	182.079	1.32801	C6H14O6	[M]+	Organooxygen compounds	Carbohydrates and carbohydrate conjugates	C01697	Carbohydrate metabolism; Membrane transport; Global and overview maps	608-66-2	HMDB0000107	BioDeepDB	2	pos	5.57867e+07	5.34258e+07	5.46724e+07	5.45894e+07	5.50771e+07	5.44391e+07
M183T328	4-Pyridoxic acid	182.986	328.3	183.053	0.950066	C8H9NO4	[M]+	Pyridines and derivatives	Pyridinecarboxylic acids and derivatives	C00847	Metabolism of cofactors and vitamins; Global and overview maps	82-82-6	HMDB0000017	BioDeepDB	2	pos	6.74465e+07	4.14895e+07	4.27324e+07	4.31764e+07	3.77774e+07	9.13749e+06
M200T35	Dodecanoic acid	199.987	34.6	200.178	1.41002	C12H24O2	[M]+	Fatty Acyls	Fatty acids and conjugates	C02679	Lipid metabolism; Biosynthesis of other secondary metabolites; Global and overview maps	143-07-7	HMDB0000638	BioDeepDB	2	pos	3.06631e+07	3.70325e+07	3.91123e+07	3.58578e+07	3.35067e+07	3.80145e+07
M204T53	N-Acetyl-D-glucosamine	204.088	52.7	221.09	24.6659	C8H15NO6	[M+H-H2O]+	Organooxygen compounds	Carbohydrates and carbohydrate conjugates	C00140	Carbohydrate metabolism; Membrane transport; Global and overview maps	7512-17-6	HMDB0000215	MoNA	2	pos	1.67204e+08	1.88984e+08	1.91477e+08	2.10492e+08	2.12137e+08	3.38016e+08
M224T91	Hydroxykynurenine	224.13	91.5	224.08	5.8866	C10H12N2O4	[M]+	Organooxygen compounds	Carbonyl compounds	C02794		484-78-6 / 2147-61-7	HMDB0000732	BioDeepDB	2	pos	4.09565e+07	1.19405e+07	4.57523e+07	1.09975e+07	6.36408e+07	7.26807e+07
M224T573	Methyl jasmonate	223.989	572.7	224.141	6.29592	C13H20O3	[M]+	Fatty Acyls	Lineolic acids and derivatives	C11512	Lipid metabolism; Global and overview maps	1211-29-6 / 39924-52-2	HMDB0036583	BioDeepDB	2	pos	7.03677e+07	1.90919e+07	4.54729e+07	7.59745e+07	2.63166e+08	1.1883e+08
M228T497	Deoxyuridine	228.195	497	228.075	3.96297	C9H12N2O5	[M]+	Pyrimidine nucleosides	Pyrimidine 2'-deoxyribonucleosides	C00526	Membrane transport; Global and overview maps; Nucleotide metabolism	951-78-0	HMDB0000012	BioDeepDB	2	pos	1.43379e+07	2.25055e+07	4.15895e+06	5.16623e+06	1.68955e+07	4.53157e+06
M220T113	Pantothenic acid	220.119	112.5	219.111	3.28913	C9H17NO5	[M+H]+	Alcohols and polyols	Polyols	C00864	Metabolism of cofactors and vitamins; Metabolism of other amino acids; Global and overview maps; Digestive system	79-83-4 / 20938-62-9 / 137-08-6	HMDB0000210	BioDeepDB	2	pos	2.58498e+08	2.21083e+08	1.98687e+08	2.29558e+08	2.38556e+08	2.42538e+08
M226T378	Porphobilinogen	226.181	377.9	226.095	1.07325	C10H14N2O4	[M]+	Organonitrogen compounds	Amines	C00931	Metabolism of cofactors and vitamins; Global and overview maps	487-90-1	HMDB0000245	BioDeepDB	2	pos	3.54898e+07	4.14879e+07	3.71467e+07	4.56482e+07	4.32364e+07	4.63145e+07
M256T687	Palmitic acid	256.263	687.2	256.24	0.389303	C16H32O2	[M]+	Fatty Acyls	Fatty acids and conjugates	C00249	Lipid metabolism; Chemical structure transformation maps; Global and overview maps	57-10-3	HMDB0000220	BioDeepDB	2	pos	8.61711e+07	3.39404e+07	9.44492e+07	3.46356e+07	1.07368e+09	2.02468e+08
M278T259	Gamma-Linolenic acid	278.187	258.6	278.225	5.55375	C18H30O2	[M]+	Fatty Acyls	Lineolic acids and derivatives	C06426	Lipid metabolism; Global and overview maps	506-26-3	HMDB0003073	BioDeepDB	2	pos	3.07959e+06	1.36343e+07	3.36752e+06	1.31478e+07	4.86497e+06	1.43141e+07
M280T505	Linoleic acid	280.264	504.5	280.24	5.2529	C18H32O2	[M]+	Fatty Acyls	Lineolic acids and derivatives	C01595	Lipid metabolism; Chemical structure transformation maps; Global and overview maps	60-33-3	HMDB0000673	BioDeepDB	2	pos	2.06766e+07	1.85414e+07	1.10465e+07	1.79179e+07	1.40083e+07	6.60795e+07
M282T633	1-Methyladenosine	282.222	633.3	281.112	13.0113	C11H15N5O4	[M+H]+	Purine nucleosides		C02494		15763-06-1	HMDB0003331	BioDeepDB	2	pos	4.89176e+07	5.0902e+07	3.94758e+07	4.69221e+07	3.83488e+07	4.9243e+07
M283T220	Oleic acid	283.176	219.8	282.256	4.70028	C18H34O2	[M+H]+	Fatty Acyls	Fatty acids and conjugates	C00712	Lipid metabolism; Chemical structure transformation maps; Aging	112-80-1	HMDB0000207	BioDeepDB	2	pos	8.41271e+06	8.27443e+06	5.27859e+06	7.22435e+06	1.70481e+06	8.54729e+06
M279T517	Alpha-Linolenic acid	279.233	517.2	278.225	4.02531	C18H30O2	[M+H]+	Fatty Acyls	Lineolic acids and derivatives	C06427	Lipid metabolism; Chemical structure transformation maps; Global and overview maps	463-40-1	HMDB0001388	BioDeepDB	2	pos	2.63486e+07	3.14205e+07	2.80547e+07	3.08566e+07	2.86837e+07	3.07794e+07
M291T128	Epicatechin	291.087	128.1	290.079	1.03062	C15H14O6	[M+H]+	Flavonoids	Flavans	C09727	Chemical structure transformation maps; Biosynthesis of other secondary metabolites; Global and overview maps	490-46-0	HMDB0001871	BioDeepDB	2	pos	1.0595e+07	9.25203e+06	1.25249e+07	1.00097e+07	2.64613e+07	2.65912e+07
M312T602	Arachidic acid	312.327	602.2	312.303	4.46885	C20H40O2	[M]+	Fatty Acyls	Fatty acids and conjugates	C06425	Lipid metabolism	506-30-9	HMDB0002212	BioDeepDB	2	pos	3.90132e+07	1.79518e+08	5.68545e+07	5.38127e+07	6.99798e+07	5.66074e+07
M313T534	Aflatoxin B1	313.235	534.3	312.063	0.127668	C17H12O6	[M+H]+	Coumarins and derivatives	Furanocoumarins	C06800	Biosynthesis of other secondary metabolites; Global and overview maps; Xenobiotics biodegradation and metabolism; Cancer: specific types	1162-65-8	HMDB0006552	BioDeepDB	2	pos	9.92838e+06	9.74639e+06	8.97644e+06	1.02846e+07	1.16908e+07	1.0764e+07
M338T611_2	Erucic acid	338.342	610.5	338.318	3.45889	C22H42O2	[M]+	Fatty Acyls	Fatty acids and conjugates	C08316	Lipid metabolism	112-86-7	HMDB0002068	BioDeepDB	2	pos	4.67816e+09	2.14748e+10	5.7466e+09	7.14332e+09	7.68512e+09	4.72248e+09
M342T52	Turanose	342.141	52.2	342.116	3.58276	C12H22O11	[M]+	Fatty Acyls	Fatty acyl glycosides	C19636		547-25-1	HMDB0011740	BioDeepDB	2	pos	3.13405e+08	2.23215e+08	1.4394e+08	3.12363e+08	1.63187e+08	1.76566e+08
M347T415	Cortexolone	347.223	415.1	346.214	1.54683	C21H30O4	[M+H]+	Steroids and steroid derivatives	Hydroxysteroids	C05488	Lipid metabolism; Endocrine and metabolic disease; Global and overview maps; Endocrine system	152-58-9	HMDB0000015	BioDeepDB	2	pos	1.00896e+07	7.78335e+06	9.79529e+06	9.33706e+06	9.44732e+06	9.80206e+06
M355T623	Prostaglandin F2a	355.284	622.7	354.241	3.79357	C20H34O5	[M+H]+	Fatty Acyls	Eicosanoids	C00639	Nervous system; Signal transduction; Digestive system; Endocrine system; Lipid metabolism; Signaling molecules and interaction; Global and overview maps	551-11-1	HMDB0001139	BioDeepDB	2	pos	3.67645e+07	3.93492e+07	2.85531e+07	3.2729e+07	6.82172e+07	4.61852e+07
M377T254_1	Riboflavin	377.145	254	376.138	0.0666702	C17H20N4O6	[M+H]+	Pteridines and derivatives	Alloxazines and isoalloxazines	C00255	Metabolism of cofactors and vitamins; Global and overview maps; Membrane transport; Digestive system	83-88-5	HMDB0000244	BioDeepDB	2	pos	1.99295e+07	1.47812e+07	1.38905e+07	9.96448e+06	1.92286e+07	1.73611e+07
M455T595	Maslinic acid	455.356	595.3	472.355	17.4237	C30H48O4	[M+H-H2O]+	Prenol lipids	Triterpenoids	C16939		4373-41-5	HMDB0002392	BioDeepDB	2	pos	3.74745e+07	1.05912e+07	2.22913e+07	9.25336e+06	1.18721e+07	4.71569e+07
M545T638	Protoporphyrin IX	545.403	638.5	562.258	3.74676	C34H34N4O4	[M+H-H2O]+	Tetrapyrroles and derivatives	Porphyrins	C02191	Metabolism of cofactors and vitamins; Global and overview maps	553-12-8	HMDB0000241	BioDeepDB	2	pos	6.39018e+06	1.4575e+06	3.71378e+06	6.22364e+06	6.41231e+06	1.50003e+06
M105T77	2-Phenylethanol	105.071	76.9	122.073	2.03781	C8H10O	[M+H-H2O]+	Benzene and substituted derivatives		C05853	Amino acid metabolism	60-12-8	HMDB0033944	BioDeepDB	2	pos	2.02765e+07	1.35195e+07	1.29398e+07	4.41033e+07	3.02674e+07	2.20536e+07
M136T54	Adenine	136.063	54	135.054	8.0845	C5H5N5	[M+H]+	Imidazopyrimidines	Purines and purine derivatives	C00147	Metabolism of terpenoids and polyketides; Global and overview maps; Nucleotide metabolism	73-24-5	HMDB0000034	BioDeepDB	2	pos	1.10298e+09	1.08177e+09	9.92969e+08	1.13061e+09	1.05473e+09	1.16425e+09
M143T34	Kojic acid	143.034	33.9	142.027	0.531343	C6H6O4	[M+H]+	Pyrans	Pyranones and derivatives	C14516		501-30-4	HMDB0032923	BioDeepDB	2	pos	9.52659e+06	8.95711e+07	4.00414e+07	8.61049e+07	8.80723e+07	1.87011e+07
M150T618	5-Isopropyl-2-methylphenol	150.103	618.1	150.105	8.66071	C10H14O	[M]+	Prenol lipids	Monoterpenoids	C09840		499-75-2	HMDB0035770	BioDeepDB	2	pos	1.72306e+06	3.89983e+07	4.07769e+06	3.46434e+07	2.01063e+07	4.31805e+06
M167T414	Vanylglycol	167.071	413.8	184.074	2.47822	C9H12O4	[M+H-H2O]+	Phenols	Methoxyphenols	C05594	Amino acid metabolism; Global and overview maps	534-82-7 / 67423-45-4	HMDB0001490	BioDeepDB	2	pos	1.40847e+07	1.40816e+07	1.2628e+07	1.8197e+07	1.50773e+07	1.27566e+07
M169T99	Pyridoxamine	169.097	99.3	168.09	0.14193	C8H12N2O2	[M+H]+	Pyridines and derivatives	Pyridoxamines	C00534	Metabolism of cofactors and vitamins; Global and overview maps; Digestive system	85-87-0	HMDB0001431	BioDeepDB	2	pos	2.89108e+07	2.25905e+07	2.13544e+07	2.47188e+07	2.51904e+07	2.41582e+07
M180T300	Metanephrine	180.103	300.4	197.105	27.9507	C10H15NO3	[M+H-H2O]+	Phenols	Methoxyphenols	C05588	Amino acid metabolism; Global and overview maps	5001-33-2	HMDB0004063	BioDeepDB	2	pos	1.58257e+07	1.78833e+07	1.68444e+07	1.69595e+07	1.67741e+07	2.05801e+07
M193T427	(-)-Jasmonic acid	193.121	427.5	210.126	16.2281	C12H18O3	[M+H-H2O]+	Fatty Acyls	Lineolic acids and derivatives	C08491	Lipid metabolism; Signal transduction; Chemical structure transformation maps; Global and overview maps	c("6894-38-8", "59366-47-1")	HMDB0032797	mzCloud	2	pos	2.79102e+07	1.44806e+08	2.53138e+07	1.13387e+08	5.35497e+07	5.35916e+07
M203T418	(-)-alpha-Curcumene	203.18	417.6	202.172	3.07117	C15H22	[M+H]+	Prenol lipids	Sesquiterpenoids	C09649		4176-17-4	HMDB0061838	BioDeepDB	2	pos	1.48007e+08	1.09677e+08	1.16737e+08	1.22631e+08	1.18325e+08	1.26645e+08
M203T664	Caryophyllene alpha-oxide	203.18	664.1	220.183	25.7603	C15H24O	[M+H-H2O]+	Prenol lipids	Sesquiterpenoids	C16908		1139-30-6	HMDB0036789	BioDeepDB	2	pos	1.92095e+07	6.80679e+06	2.35049e+07	5.83429e+06	2.20677e+07	2.67662e+07
M207T232	Sinapic acid	207.066	232.3	224.069	22.8623	C11H12O5	[M+H-H2O]+	Cinnamic acids and derivatives	Hydroxycinnamic acids and derivatives	C00482	Chemical structure transformation maps; Biosynthesis of other secondary metabolites; Global and overview maps	530-59-6/530-59-6 7362-37-0/7362-37-0	HMDB0032616	MoNA	2	pos	1.53676e+07	1.31526e+07	1.20857e+07	1.81052e+07	1.47768e+07	1.45787e+07
M215T506	Isoalantolactone	215.144	506.1	232.146	23.3983	C15H20O2	[M+H-H2O]+	Prenol lipids	Terpene lactones	C09484		470-17-7	HMDB0035934	BioDeepDB	2	pos	3.52769e+07	4.97814e+07	2.76124e+07	2.87485e+07	2.96222e+07	2.76363e+07
M219T527	Capsidiol	219.173	526.5	236.178	8.21269	C15H24O2	[M+H-H2O]+	Prenol lipids	Sesquiterpenoids	C09627	Metabolism of terpenoids and polyketides	37208-05-2	HMDB0002352	BioDeepDB	2	pos	6.57129e+06	1.7581e+07	2.1258e+07	9.99471e+07	3.14637e+07	3.05075e+07
M203T496	2-trans,6-trans-Farnesal	203.179	496	220.183	18.3779	C15H24O	[M+H-H2O]+	Prenol lipids	Sesquiterpenoids	C03461	Global and overview maps; Metabolism of terpenoids and polyketides	502-67-0 / 19317-11-4	HMDB0060356	BioDeepDB	2	pos	4.48787e+07	5.4181e+07	1.73799e+08	5.83042e+07	2.46012e+07	2.57968e+07
M233T506	Alantolactone	233.155	506.1	232.146	5.1468	C15H20O2	[M+H]+	Naphthofurans		C09289		546-43-0	HMDB0035906	BioDeepDB	2	pos	5.17762e+08	4.31492e+08	3.66038e+08	4.52049e+08	4.25845e+08	4.38972e+08
M265T278	(S)-Abscisic acid	265.145	277.6	264.136	4.9935	C15H20O4	[M+H]+	Prenol lipids	Sesquiterpenoids	C06082	Chemical structure transformation maps; Signal transduction; Global and overview maps; Metabolism of terpenoids and polyketides	21293-29-8	HMDB0035140	BioDeepDB	2	pos	7.10954e+07	1.5672e+07	4.19992e+07	5.1648e+07	6.00434e+07	1.23964e+08
M277T629	Stearidonic acid	277.217	628.7	276.209	3.60728	C18H28O2	[M+H]+	Fatty Acyls	Lineolic acids and derivatives	C16300	Lipid metabolism; Global and overview maps	20290-75-9	HMDB0006547	BioDeepDB	2	pos	1.44846e+07	1.2728e+07	4.3495e+06	3.05068e+07	2.98929e+06	2.3273e+06
M277T684	9-OxoODE	277.216	684	294.219	12.7482	C18H30O3	[M+H-H2O]+	Fatty Acyls	Lineolic acids and derivatives	C14766	Lipid metabolism	54232-59-6	HMDB0004669	mzCloud	2	pos	3.26414e+07	1.2739e+07	7.81377e+06	2.75896e+06	6.58915e+06	2.2097e+06
M295T614	13-L-Hydroperoxylinoleic acid	295.225	613.8	312.23	7.56711	C18H32O4	[M+H-H2O]+	Fatty Acyls	Lineolic acids and derivatives	C04717	Lipid metabolism; Global and overview maps	33964-75-9	HMDB0003871	BioDeepDB	2	pos	2.82957e+06	2.90608e+06	9.57329e+06	3.88719e+07	1.14546e+07	1.66261e+06
M298T195	5'-Methylthioadenosine	298.098	194.9	297.09	3.43511	C11H15N5O3S	[M+H]+	5'-deoxyribonucleosides	5'-deoxy-5'-thionucleosides	C00170	Chemical structure transformation maps; Amino acid metabolism; Global and overview maps; Metabolism of terpenoids and polyketides	2457-80-9	HMDB0001173	BioDeepDB	2	pos	1.37601e+07	1.13699e+07	3.50185e+07	3.6307e+07	4.0581e+07	2.89251e+07
M303T517	20-HETE	303.233	517.2	320.235	16.6011	C20H32O3	[M+H-H2O]+	Fatty Acyls	Fatty acids and conjugates	C14748	Lipid metabolism; Global and overview maps; Circulatory system	79551-86-3	HMDB0005998	BioDeepDB	2	pos	1.0535e+07	8.89146e+06	7.44161e+06	9.89508e+06	8.9919e+06	7.89488e+06
M348T64	AMP	348.07	64.4	347.063	1.08024	C10H14N5O7P	[M+H]+	Purine nucleotides	Purine ribonucleotides	C00020	Endocrine and metabolic disease; Drug resistance: antineoplastic; Signal transduction; Sensory system; Endocrine system; Neurodegenerative disease; Metabolism of terpenoids and polyketides; Nucleotide metabolism; Substance dependence; Chemical structure transformation maps; Global and overview maps	61-19-8	HMDB0000045	BioDeepDB	2	pos	7.09825e+07	5.49299e+07	8.21321e+07	9.5551e+07	1.03845e+08	1.04441e+08
M395T675	alpha-Spinasterol	395.37	674.6	412.37	5.05856	C29H48O	[M+H-H2O]+	Steroids and steroid derivatives	Stigmastanes and derivatives	C08840		481-18-5	HMDB0033873	BioDeepDB	2	pos	1.36453e+07	3.0467e+07	2.99673e+06	3.80908e+06	8.72933e+06	9.08426e+06
M397T672	beta-Sitosterol	397.384	672.2	414.386	2.01317	C29H50O	[M+H-H2O]+	Steroids and steroid derivatives	Stigmastanes and derivatives	C01753	Lipid metabolism; Chemical structure transformation maps; Global and overview maps	83-46-5	HMDB0000852	BioDeepDB	2	pos	3.37515e+07	2.52032e+07	1.78356e+07	7.04795e+06	3.52726e+07	5.24255e+06
M325T551	Bisoprolol	325.217	551.2	325.225	26.7514	C18H31NO4	[M]+	Benzene and substituted derivatives	Benzylethers	C06852		66722-44-9	HMDB0014750	MoNA	2	pos	1.05145e+07	7.92702e+06	7.06335e+06	8.02173e+06	7.78868e+06	9.10334e+06
M363T543	Fludrocortisone	363.197	543.3	380.2	11.3823	C21H29FO5	[M+H-H2O]+	Steroids and steroid derivatives	Hydroxysteroids	C07004		127-31-1	HMDB0014825	MoNA	2	pos	2.44813e+07	4.09714e+06	3.67559e+06	1.75461e+07	4.15366e+06	2.14896e+07
M138T637	Isophorone	138.103	637.1	138.105	10.1374	C9H14O	[M]+	Carbonyl compounds	Ketones	C14743		78-59-1	HMDB0031195	MoNA	2	pos	9.10828e+07	6.60516e+07	3.66344e+07	1.61288e+07	4.78747e+07	1.04654e+07
M171T291	Gallic acid	171.029	291.4	170.022	2.92762	C7H6O5	[M+H]+	Benzene and substituted derivatives	Benzoic acids and derivatives	C01424	Chemical structure transformation maps; Xenobiotics biodegradation and metabolism; Global and overview maps	149-91-7	HMDB0005807	MoNA	2	pos	2.51298e+07	2.33345e+07	2.3166e+07	2.37758e+07	2.69441e+07	2.7942e+07
M104T672	Choline	104.108	672.1	104.108	3.84217	C5H14NO	[M]+	Organonitrogen compounds	Quaternary ammonium salts	C00114	Cancer: overview; Membrane transport; Nervous system; Digestive system; Lipid metabolism; Amino acid metabolism; Global and overview maps	62-49-7	HMDB0000097	MoNA	2	pos	8.04107e+06	2.42148e+06	9.96714e+06	9.64482e+06	9.95548e+06	2.11197e+06
M178T462	Tyrosine methylester	178.087	461.9	195.089	24.898	C10H13NO3	[M+H-H2O]+	Carboxylic acids and derivatives	Amino acids, peptides, and analogues	C03404		1080-06-4	HMDB0029217	MoNA	2	pos	2.20422e+07	1.90306e+07	1.64758e+07	2.34605e+07	2.20856e+07	2.63216e+07
M180T85	(R)-Salsolinol	180.102	84.5	179.095	1.79898	C10H13NO2	[M+H]+	Tetrahydroisoquinolines		C09642	Chemical structure transformation maps	525-72-4 / 27740-96-1	HMDB0005199	BioDeepDB	2	pos	4.98213e+07	4.93276e+07	5.02648e+07	5.57219e+07	5.51792e+07	5.94869e+07
M189T119	Glycylleucine	189.124	118.6	188.116	3.82817	C8H16N2O3	[M+H]+	Carboxylic acids and derivatives	Amino acids, peptides, and analogues	C02155		869-19-2	HMDB0000759	MoNA	2	pos	5.81107e+06	2.23119e+07	1.91428e+07	2.33273e+07	2.50003e+07	6.63607e+06
M217T92	beta-Alanyl-L-lysine	217.157	92.3	217.143	9.06151	C9H19N3O3	[M]+	Peptidomimetics	Hybrid peptides	C05341	Metabolism of other amino acids; Global and overview maps		HMDB0060442	BioDeepDB	2	pos	8.43673e+07	6.73765e+07	6.62943e+07	7.34378e+07	7.76403e+07	7.39805e+07
M342T272	Coniferin	342.127	271.8	342.132	12.8607	C16H22O8	[M]+	Carbohydrates and carbohydrate conjugates	Glycosyl compounds	C00761	Biosynthesis of other secondary metabolites	531-29-3	HMDB0013682	MoNA	2	pos	2.56901e+07	2.24222e+07	2.16792e+07	2.47962e+07	2.61557e+07	2.75823e+07
M397T627	Clionasterol	397.382	627.3	414.386	8.64155	C29H50O	[M+H-H2O]+	Steroids and steroid derivatives	Stigmastanes and derivatives	C19654		83-47-6	HMDB0000649	MoNA	2	pos	8.3968e+06	3.00127e+07	1.74845e+07	1.28777e+07	1.39885e+07	3.21715e+06
M487T60	Raffinose	487.166	59.9	504.169	9.71742	C18H32O16	[M+H-H2O]+	Organooxygen compounds	Carbohydrates and carbohydrate conjugates	C00492	Carbohydrate metabolism; Membrane transport; Global and overview maps	512-69-6	HMDB0003213	mzCloud	2	pos	2.35091e+07	2.67278e+07	2.39538e+07	2.87959e+07	6.61502e+06	2.77845e+07
M127T493	Maltol	127.038	492.6	126.032	5.32123	C6H6O3	[M+H]+	Pyrans	Pyranones and derivatives	C11918	Global and overview maps; Metabolism of terpenoids and polyketides	118-71-8	HMDB0030776	BioDeepDB	2	pos	5.7787e+07	7.96023e+07	2.09499e+07	1.07105e+08	2.38713e+08	1.12588e+08
M138T161	p-Aminobenzoic acid	138.055	160.9	137.048	0.00541198	C7H7NO2	[M+H]+	Benzene and substituted derivatives	Benzoic acids and derivatives	C00568	Chemical structure transformation maps; Metabolism of cofactors and vitamins; Xenobiotics biodegradation and metabolism; Global and overview maps	150-13-0 / 2906-28-7	HMDB0001392	BioDeepDB	2	pos	3.48671e+07	2.9093e+07	2.70365e+07	3.18894e+07	3.24693e+07	3.76091e+07
M147T462	Jasmone	147.117	461.9	164.12	28.7798	C11H16O	[M+H-H2O]+	Organooxygen compounds	Carbonyl compounds	C08490		488-10-8	HMDB0035601	mzCloud	2	pos	1.87063e+09	1.48451e+09	1.35499e+09	1.59158e+09	1.61383e+09	1.632e+09
M162T47	beta-D-Glucosamine	162.077	47.3	179.079	27.9744	C6H13NO5	[M+H-H2O]+	Carbohydrates and carbohydrate conjugates	Aminosaccharides	C08349		c("14257-69-3", "3416-24-8")	HMDB0030091	mzCloud	2	pos	4.79461e+07	5.69174e+07	1.35241e+07	5.35406e+07	5.02832e+07	5.30639e+07
M180T111_1	Phenibut	180.102	110.9	179.095	0.529326	C10H13NO2	[M+H]+	Drugs of Abuse/Illegal Drugs		D10509				mzCloud	2	pos	3.31411e+07	3.26623e+07	3.20547e+07	3.84225e+07	3.84613e+07	4.33227e+07
M219T598	Nootkatone	219.177	597.7	218.167	13.3408	C15H22O	[M+H]+	Prenol lipids	Sesquiterpenoids	C17914		4674-50-4	HMDB0013687	mzCloud	2	pos	4.09385e+07	5.04955e+06	1.25965e+07	1.62367e+07	2.08287e+07	5.20151e+06
M275T313	Phloretin	275.092	313.2	274.084	2.99536	C15H14O5	[M+H]+	Linear 1,3-diarylpropanoids	Chalcones and dihydrochalcones	C00774	Biosynthesis of other secondary metabolites; Global and overview maps	60-82-2	HMDB0003306	mzCloud	2	pos	1.52869e+07	1.33515e+07	1.35619e+07	1.5834e+07	1.65634e+07	1.79448e+07
M294T443	Paclobutrazol	294.137	442.7	293.13	0.258383	C15H20ClN3O	[M+H]+	Pesticides/Herbicides		C18479		76738-62-0		mzCloud	2	pos	1.57747e+07	1.09546e+07	1.10103e+07	1.20189e+07	1.20089e+07	1.23828e+07
M291T382_1	Cyproconazole	291.121	382.1	291.114	24.9383	C15H18ClN3O	[M]+	Pesticides/Herbicides		C18456		94361-06-5		mzCloud	2	pos	4.00396e+07	3.86196e+07	3.53708e+07	4.17692e+07	4.20357e+07	4.53814e+07
M310T579	N,N-Dimethylsphing-4-enine	310.311	578.8	327.314	16.5447	C20H41NO2	[M+H-H2O]+	Organonitrogen compounds	Amines	C13914		c("122314-67-4", "119567-63-4")	HMDB0013645	mzCloud	2	pos	7.64015e+07	7.74936e+07	3.105e+07	5.43572e+07	4.93725e+07	4.09921e+07
M431T326	Ononin	431.135	325.7	430.126	2.83902	C22H22O9	[M+H]+	Isoflavonoids	Isoflavonoid O-glycosides	C10509	Biosynthesis of other secondary metabolites	486-62-4	HMDB0033987	mzCloud	2	pos	9.76888e+06	7.41123e+06	7.65531e+06	8.6224e+06	8.29752e+06	9.65243e+06
M439T642	Oleanolic acid	439.358	642.1	456.36	12.5956	C30H48O3	[M+H-H2O]+	Prenol lipids	Triterpenoids	C17148		508-02-1	HMDB0002364	mzCloud	2	pos	2.33286e+06	8.47241e+06	5.17089e+06	9.25314e+06	9.65553e+06	8.4636e+06
M439T652	Ursolic acid	439.358	651.6	456.36	12.5956	C30H48O3	[M+H-H2O]+	Prenol lipids	Triterpenoids	C08988		77-52-1	HMDB0002395	mzCloud	2	pos	1.64091e+06	8.99585e+06	1.13859e+07	6.0418e+06	8.27903e+06	7.79924e+06
M453T522	Glycyrrhetinate	453.34	522.3	470.34	16.3983	C30H46O4	[M+H-H2O]+	Prenol lipids	Triterpenoids	C02283		c("1449-05-4", "471-53-4")	HMDB0011628	mzCloud	2	pos	5.617e+07	4.80499e+07	6.35931e+07	4.86471e+07	5.13079e+07	5.13727e+07
M107T105	Benzaldehyde	107.05	104.8	106.042	0.819086	C7H6O	[M+H]+	Benzene and substituted derivatives	Benzoyl derivatives	C00261	Xenobiotics biodegradation and metabolism; Global and overview maps	100-52-7	HMDB0006115	BioDeepDB	2	pos	1.67209e+07	1.39212e+07	1.28028e+07	1.42746e+07	1.37688e+07	1.56916e+07
M112T56	Histamine	112.088	56.1	111.08	0.598984	C5H9N3	[M+H]+	Organonitrogen compounds	Amines	C00388	Nervous system; Sensory system; Digestive system; Target-based classification: G protein-coupled receptors; Signaling molecules and interaction; Amino acid metabolism; Immune disease; Chemical structure transformation maps; Immune system; Global and overview maps	51-45-6	HMDB0000870	BioDeepDB	2	pos	1.45185e+08	1.40069e+08	1.23911e+08	1.38666e+08	1.47717e+08	1.73341e+08
M118T462	Indole	118.066	461.9	117.058	0.93208	C8H7N	[M+H]+	Indoles and derivatives	Indoles	C00463	Amino acid metabolism; Biosynthesis of other secondary metabolites; Global and overview maps; Digestive system	120-72-9	HMDB0000738	BioDeepDB	2	pos	8.4226e+08	6.78542e+08	6.13546e+08	7.41454e+08	7.4772e+08	7.47213e+08
M118T105	L-2,4-diaminobutyric acid	118.066	104.8	118.074	0.808865	C4H10N2O2	[M]+	Carboxylic acids and derivatives	Amino acids, peptides, and analogues	C03283	Amino acid metabolism; Global and overview maps	1758-80-1	HMDB0006284	BioDeepDB	2	pos	2.86684e+08	2.43869e+08	2.23252e+08	2.81538e+08	2.57803e+08	2.65602e+08
M120T655	Phenylacetaldehyde	120.056	655.2	120.058	0.964822	C8H8O	[M]+	Benzene and substituted derivatives	Phenylacetaldehydes	C00601	Amino acid metabolism; Xenobiotics biodegradation and metabolism; Global and overview maps	122-78-1	HMDB0006236	BioDeepDB	2	pos	4.34979e+06	6.40443e+06	7.35298e+06	2.5026e+07	1.98992e+07	3.05173e+07
M123T101	Niacinamide	123.055	101	122.048	0.000594545	C6H6N2O	[M+H]+	Pyridines and derivatives	Pyridinecarboxylic acids and derivatives	C00153	Metabolism of cofactors and vitamins; Global and overview maps; Aging; Digestive system	98-92-0	HMDB0001406	BioDeepDB	2	pos	6.25918e+07	8.66345e+07	1.5028e+07	6.85742e+07	1.86826e+07	1.08104e+08
M124T162	Isonicotinic acid	124.04	162.5	123.032	0.00110557	C6H5NO2	[M+H]+	Pyridines and derivatives	Pyridinecarboxylic acids and derivatives	C07446	Xenobiotics biodegradation and metabolism	55-22-1	HMDB0060665	BioDeepDB	2	pos	3.59294e+07	4.31517e+07	1.07719e+07	6.10878e+07	4.91344e+08	1.03564e+08
M125T491	4-Methylcatechol	125.06	491	124.052	1.06316	C7H8O2	[M+H]+	Phenols	Benzenediols	C06730	Xenobiotics biodegradation and metabolism; Global and overview maps	452-86-8	HMDB0000873	BioDeepDB	2	pos	2.60223e+07	1.90616e+07	1.65915e+07	2.0861e+07	2.10693e+07	2.12083e+07
M127T313	1,2,3-Trihydroxybenzene	127.039	312.6	126.032	2.95973	C6H6O3	[M+H]+	Benzene and substituted derivatives	Phenols and derivatives	C01108	Xenobiotics biodegradation and metabolism; Global and overview maps; Target-based classification: Enzymes	87-66-1	HMDB0013674	BioDeepDB	2	pos	9.95749e+07	2.55318e+08	7.65256e+07	2.10849e+08	1.68386e+08	4.55738e+07
M130T56	(2E)-Decenoyl-ACP	130.086	56.4	129.079	0.0005338	C6H11NO2	[M+H]+	Carboxylic acids and derivatives	Amino acids, peptides, and analogues	C03969		52-52-8	HMDB0062225	BioDeepDB	2	pos	1.0854e+09	1.00979e+09	1.04105e+09	1.02801e+09	1.08274e+09	1.13485e+09
M133T312	Cinnamaldehyde	133.065	311.7	132.058	0.0182218	C9H8O	[M+H]+	Cinnamaldehydes		C00903	Chemical structure transformation maps; Biosynthesis of other secondary metabolites; Global and overview maps; Sensory system	104-55-2 / 14371-10-9	HMDB0003441	BioDeepDB	2	pos	5.48619e+08	4.59224e+08	4.34837e+08	4.84397e+08	4.93274e+08	5.16328e+08
M135T159	(R)-mandelic Acid	135.045	159.3	152.047	3.0118	C8H8O3	[M+H-H2O]+	Benzene and substituted derivatives		C01983	Xenobiotics biodegradation and metabolism; Global and overview maps	611-71-2	HMDB0062635	BioDeepDB	2	pos	1.98444e+07	1.8307e+07	1.74216e+07	2.2965e+07	2.01044e+07	2.48618e+07
M135T257	Chavicol	135.081	257.1	134.073	0.00414035	C9H10O	[M+H]+	Phenols	1-hydroxy-2-unsubstituted benzenoids	C16930	Biosynthesis of other secondary metabolites	501-92-8	HMDB0034107	BioDeepDB	2	pos	3.96512e+07	4.18585e+07	3.3932e+07	3.85288e+07	3.70565e+07	3.64722e+07
M137T96	2-Methylbenzoic acid	137.06	95.6	136.052	1.8881	C8H8O2	[M+H]+	Benzene and substituted derivatives	Benzoic acids and derivatives	C07215	Xenobiotics biodegradation and metabolism; Global and overview maps	118-90-1	HMDB0002340	BioDeepDB	2	pos	4.7129e+07	4.73051e+07	4.15207e+07	5.00253e+07	5.24257e+07	5.59011e+07
M140T510	Acetylphosphate	139.988	510.3	139.988	4.25281	C2H5O5P	[M]+	Organic phosphoric acids and derivatives	Phosphate esters	C00227	Carbohydrate metabolism; Energy metabolism; Metabolism of other amino acids; Global and overview maps	590-54-5	HMDB0001494	BioDeepDB	2	pos	8.29144e+07	1.36048e+08	1.01121e+08	1.33338e+08	2.82346e+07	2.42973e+07
M145T273	2-Keto-glutaramic acid	145.05	273.1	145.037	3.0202	C5H7NO4	[M]+	Keto acids and derivatives	Short-chain keto acids and derivatives	C00940	Amino acid metabolism; Global and overview maps	18465-19-5	HMDB0001552	BioDeepDB	2	pos	2.15107e+08	2.80556e+07	1.33462e+08	8.15213e+07	6.94942e+07	4.71398e+08
M145T189	4-Guanidinobutanoic acid	145.085	188.9	145.085	1.3785	C5H11N3O2	[M]+	Carboxylic acids and derivatives	Amino acids, peptides, and analogues	C01035	Amino acid metabolism; Global and overview maps	463-00-3	HMDB0003464	BioDeepDB	2	pos	4.76339e+07	3.82401e+07	3.61035e+07	4.36607e+07	4.36005e+07	4.63725e+07
M146T44	Oxoglutaric acid	146.03	43.6	146.022	0.217376	C5H6O5	[M]+	Keto acids and derivatives	Gamma-keto acids and derivatives	C00026	Cancer: overview; Metabolism of other amino acids; Signal transduction; Nervous system; Endocrine system; Excretory system; Carbohydrate metabolism; Digestive system; Xenobiotics biodegradation and metabolism; Amino acid metabolism; Chemical structure transformation maps; Global and overview maps	328-50-7 / 64-15-3	HMDB0000208	BioDeepDB	2	pos	4.4413e+07	4.59904e+07	1.08926e+07	5.16341e+07	5.82507e+07	5.94272e+07
M147T74_1	L-Glutamic acid	147.045	74.2	147.053	4.67096	C5H9NO4	[M]+	Carboxylic acids and derivatives	Amino acids, peptides, and analogues	C00025	Neurodegenerative disease; Biosynthesis of other secondary metabolites; Substance dependence; Cellular community - eukaryotes; Energy metabolism; Metabolism of other amino acids; Excretory system; Carbohydrate metabolism; Cancer: overview; Membrane transport; Cell growth and death; Signal transduction; Nervous system; Digestive system; Environmental adaptation; Amino acid metabolism; Chemical str…	6893-26-1	HMDB0003339	BioDeepDB	2	pos	8.92648e+07	7.89259e+07	8.35872e+07	8.05186e+07	8.78526e+07	9.16306e+07
M151T397	Perillyl aldehyde	151.112	397.3	150.105	1.08206	C10H14O	[M+H]+	Prenol lipids	Monoterpenoids	C02576	Metabolism of terpenoids and polyketides	2111-75-3	HMDB0003647	BioDeepDB	2	pos	3.58719e+07	3.189e+07	3.10694e+07	3.51973e+07	7.65705e+06	3.24407e+07
M153T35	3-Sulfinylpyruvic acid	152.995	35.4	151.978	0.0105547	C3H4O5S	[M+H]+	Keto acids and derivatives	Alpha-keto acids and derivatives	C05527	Amino acid metabolism; Global and overview maps		HMDB0001405	BioDeepDB	2	pos	1.07938e+07	1.24554e+07	1.17984e+07	1.2094e+07	1.04139e+07	8.74726e+06
M154T217	2-Pyrocatechuic acid	154.042	216.6	154.027	2.18573	C7H6O4	[M]+	Benzene and substituted derivatives	Benzoic acids and derivatives	C00196	Chemical structure transformation maps; Xenobiotics biodegradation and metabolism; Global and overview maps; Metabolism of terpenoids and polyketides	303-38-8	HMDB0000397	BioDeepDB	2	pos	3.41491e+08	4.306e+08	4.29718e+08	4.85751e+08	4.99484e+08	5.0105e+08
M161T417	4-Acetamido-2-aminobutanoic acid	161.097	416.6	160.085	29.9447	C6H12N2O3	[M+H]+	Carboxylic acids and derivatives	Amino acids, peptides, and analogues	C06442	Amino acid metabolism; Global and overview maps	1190-46-1	HMDB0031411	BioDeepDB	2	pos	4.18866e+07	3.42821e+07	3.00974e+07	4.96184e+07	3.63014e+07	4.97267e+07
M164T272	4-Hydroxycinnamic acid	164.047	271.9	164.047	0.60958	C9H8O3	[M]+	Cinnamic acids and derivatives	Hydroxycinnamic acids and derivatives	C00811	Metabolism of cofactors and vitamins; Biosynthesis of other secondary metabolites; Amino acid metabolism; Chemical structure transformation maps; Global and overview maps	7400-08-0 / 7400-08-0 501-98-4 / 501-98-4	HMDB0002035	BioDeepDB	2	pos	1.39737e+07	1.33155e+07	1.49746e+07	1.35954e+07	4.04275e+06	1.77036e+07
M167T245	Perillic acid	167.108	244.7	166.099	5.42463	C10H14O2	[M+H]+	Prenol lipids	Monoterpenoids	C11924	Metabolism of terpenoids and polyketides	7694-45-3	HMDB0004586	BioDeepDB	2	pos	1.11539e+08	8.89017e+07	8.79879e+07	1.02076e+08	9.32717e+07	1.01191e+08
M167T487	3-(2-Hydroxyphenyl)propanoic acid	167.071	486.7	166.063	4.08221	C9H10O3	[M+H]+	Phenylpropanoic acids		C01198	Amino acid metabolism; Xenobiotics biodegradation and metabolism; Global and overview maps	495-78-3	HMDB0033752	BioDeepDB	2	pos	1.78089e+07	2.84824e+07	1.34827e+07	1.80927e+07	1.97948e+07	2.09714e+07
M172T74_2	Homocitrulline	172.109	74.2	189.111	27.5059	C7H15N3O3	[M+H-H2O]+	Carboxylic acids and derivatives	Amino acids, peptides, and analogues	C02427		1190-49-4	HMDB0000679	BioDeepDB	2	pos	7.71349e+07	8.0023e+07	8.53025e+07	7.45927e+07	8.14072e+07	9.15868e+07
M179T240	7-Aminomethyl-7-carbaguanine	179.07	240	179.081	1.82989	C7H9N5O	[M]+	Pyrrolopyrimidines	Pyrrolo[2,3-d]pyrimidines	C16675	Metabolism of cofactors and vitamins; Global and overview maps		HMDB0011690	BioDeepDB	2	pos	1.92937e+08	1.6134e+08	1.38958e+08	1.57146e+08	1.74277e+08	1.62389e+08
M179T431	Methylisoeugenol	179.106	430.6	178.099	0.109238	C11H14O2	[M+H]+	Benzene and substituted derivatives	Methoxybenzenes	C10478	Biosynthesis of other secondary metabolites	6379-72-2	HMDB0041553	BioDeepDB	2	pos	2.70321e+07	2.62901e+07	2.33376e+07	2.79068e+07	2.70588e+07	3.261e+07
M188T82	2-Keto-6-acetamidocaproate	188.092	81.8	187.084	0.426831	C8H13NO4	[M+H]+	Keto acids and derivatives	Medium-chain keto acids and derivatives	C05548	Amino acid metabolism; Global and overview maps	59403-50-8	HMDB0012150	BioDeepDB	2	pos	2.94221e+07	3.28636e+07	6.53917e+07	3.19571e+07	3.18331e+07	3.53359e+07
M189T49	L-Targinine	189.135	48.6	188.127	0.38996	C7H16N4O2	[M+H]+	Carboxylic acids and derivatives	Amino acids, peptides, and analogues	C03884		17035-90-4 / NA	HMDB0029416	BioDeepDB	2	pos	1.62602e+08	1.90554e+08	1.76955e+08	1.89064e+08	2.14809e+08	2.07516e+08
M209T259	trans-Isoasarone	209.118	258.6	208.11	4.89675	C12H16O3	[M+H]+	Benzene and substituted derivatives	Phenols and derivatives	C17846		2883-98-9	HMDB0031469	BioDeepDB	2	pos	3.86825e+07	3.42275e+07	3.45085e+07	3.62014e+07	3.83281e+07	3.6544e+07
M197T229	Gulonic acid	197.081	229.1	196.058	1.59389	C6H12O7	[M+H]+	Hydroxy acids and derivatives	Medium-chain hydroxy acids and derivatives	C00800	Carbohydrate metabolism; Global and overview maps	20246-53-1 / 526-97-6	HMDB0003290	BioDeepDB	2	pos	3.71804e+07	3.2535e+07	2.95154e+07	3.46017e+07	3.13143e+07	3.39916e+07
M200T123	gamma-Glutamyl-beta-aminopropiononitrile	200.092	123.4	199.096	2.04874	C8H13N3O3	[M+H]+	Carboxylic acids and derivatives	Amino acids, peptides, and analogues	C06114	Metabolism of other amino acids		HMDB0060477	BioDeepDB	2	pos	2.92194e+07	2.44947e+07	2.38435e+07	2.72901e+07	2.81702e+07	2.86189e+07
M201T237	Harmalol	201.103	236.9	200.095	1.61112	C12H12N2O	[M+H]+	Harmala alkaloids		C06537		525-57-5	HMDB0029838	BioDeepDB	2	pos	1.42999e+07	3.61472e+06	1.02082e+07	1.12046e+07	3.45147e+06	3.79376e+06
M202T195	Thiabendazole	202.045	195	201.036	1.8718	C10H7N3S	[M+H]+	Benzimidazoles		C07131		148-79-8	HMDB0014868	BioDeepDB	2	pos	5.0113e+08	6.49348e+08	5.89152e+08	6.88118e+08	7.11388e+08	7.2056e+08
M205T430	Apiole	205.087	430.1	222.089	26.496	C12H14O4	[M+H-H2O]+	Benzodioxoles		C10429		523-80-8	HMDB0033776	BioDeepDB	2	pos	6.26155e+07	2.87072e+07	3.09839e+07	3.09064e+07	2.7501e+07	3.05841e+07
M215T238	Kinetin	215.082	238.5	215.081	7.43901	C10H9N5O	[M]+	Imidazopyrimidines	Purines and purine derivatives	C08272		525-79-1	HMDB0012245	BioDeepDB	2	pos	1.47196e+07	1.34187e+07	1.39573e+07	1.64564e+07	1.58967e+07	1.62338e+07
M276T57	4-Hydroxycinnamoylagmatine	276.145	57.5	276.159	4.48994	C14H20N4O2	[M]+	Cinnamic acids and derivatives	Hydroxycinnamic acids and derivatives	C04498	Amino acid metabolism; Global and overview maps	7295-86-5	HMDB0033460	BioDeepDB	2	pos	4.88401e+08	4.32075e+08	3.91816e+08	4.85836e+08	4.77445e+08	5.38961e+08
M265T245	Subaphylline	265.156	244.7	264.147	3.19585	C14H20N2O3	[M+H]+	Cinnamic acids and derivatives	Hydroxycinnamic acids and derivatives	C10497	Amino acid metabolism; Global and overview maps	501-13-3	HMDB0033463	BioDeepDB	2	pos	1.15886e+08	9.50778e+07	8.32855e+07	9.6337e+07	8.78365e+07	1.02375e+08
M277T638	(2'E,4'Z,8E)-Colneleic acid	277.216	637.8	294.219	12.3875	C18H30O3	[M+H-H2O]+	Fatty Acyls	Fatty acids and conjugates	C19827		52761-34-9	HMDB0030995	BioDeepDB	2	pos	1.02834e+07	1.97196e+07	1.0378e+07	3.36856e+06	1.87224e+07	2.33634e+06
M295T231	Aspartame	295.13	230.6	294.122	0.0325053	C14H18N2O5	[M+H]+	Carboxylic acids and derivatives	Amino acids, peptides, and analogues	C11045	Sensory system	22839-47-0	HMDB0001894	BioDeepDB	2	pos	4.53524e+07	4.16326e+07	4.01873e+07	4.68874e+07	4.44018e+07	4.43756e+07
M327T324	Pentaporphyrin I	327.16	323.7	327.147	1.50793	C19H21NO4	[M]+	Tetrapyrroles and derivatives	Porphyrins	C09541	Chemical structure transformation maps	3019-51-0	HMDB0000839	BioDeepDB	2	pos	3.50138e+07	2.55413e+07	2.48209e+07	2.88206e+07	2.84391e+07	3.01087e+07
M333T83	Norsanguinarine	333.082	83	333.1	0.12893	C20H15NO4	[M]+	Quinolines and derivatives	Benzoquinolines	C05191	Biosynthesis of other secondary metabolites; Global and overview maps	522-30-5 / 3606-45-9	HMDB0030176	BioDeepDB	2	pos	2.06654e+07	1.94697e+07	2.22201e+07	2.30637e+07	1.95322e+07	2.16607e+07
M353T410	(13E)-11a-Hydroxy-9,15-dioxoprost-13-enoic acid	353.232	410	352.225	1.06446	C20H32O5	[M+H]+	Fatty Acyls	Eicosanoids	C04654		22973-19-9	HMDB0001320	BioDeepDB	2	pos	2.20641e+07	4.05843e+07	2.7917e+07	5.00436e+07	1.59618e+07	5.28031e+07
M337T298	Dattelic acid	337.093	297.8	336.084	2.52235	C16H16O8	[M+H]+	Cinnamic acids and derivatives	Hydroxycinnamic acids and derivatives	C10434	Biosynthesis of other secondary metabolites; Global and overview maps	73263-62-4	HMDB0033999	BioDeepDB	2	pos	1.29505e+07	1.49215e+07	8.22712e+06	1.24298e+07	3.19278e+06	1.41827e+07
M351T416	Prostaglandin G2	351.216	416	368.22	4.0821	C20H32O6	[M+H-H2O]+	Fatty Acyls	Eicosanoids	C05956	Nervous system; Lipid metabolism; Immune system; Structure-based classification; Global and overview maps	51982-36-6	HMDB0003235	BioDeepDB	2	pos	1.66398e+07	1.54067e+07	1.5082e+07	1.42995e+07	1.6289e+07	1.76345e+07
M355T298	Chlorogenic acid	355.104	297.7	354.095	2.27002	C16H18O9	[M+H]+	Organooxygen compounds	Alcohols and polyols	C00852	Biosynthesis of other secondary metabolites; Global and overview maps	327-97-9 / 327-97-9 202650-88-2	HMDB0003164	BioDeepDB	2	pos	1.26979e+07	1.55822e+07	1.35107e+07	1.32793e+07	1.2913e+07	1.59162e+07
M496T506	1-palmitoylglycerophosphocholine	496.341	506.5	496.34	0.000172885	C24H51NO7P	[M]+	Glycerophospholipids	Glycerophosphocholines	C04102		17364-16-8	HMDB0062541	BioDeepDB	2	pos	1.43747e+07	1.96789e+07	1.78534e+07	1.78506e+07	1.45913e+07	1.94392e+07
M299T114	4-(beta-D-Glucosyloxy)benzoate	299.076	114.1	300.084	5.43004	C13H16O8	[M-H]-	Benzene and substituted derivatives	Alcohols and polyols	C03993	Metabolism of cofactors and vitamins			MetaDNA	2	neg	6.74904e+06	6.08392e+06	5.28946e+06	4.17226e+06	5.1731e+06	2.58197e+06
M179T566	D-Sorbose	179.055	565.6	180.063	5.16039	C6H12O6	[M-H]-	Organooxygen compounds	Alcohols and polyols	C00764		3615-56-3		MetaDNA	2	neg	2.31964e+06	2.58455e+06	1.7763e+07	8.677e+06	1.48043e+07	1.93592e+07
M177T373	5-Hydroxyconiferyl alcohol	177.055	373.2	196.074	1.63791	C10H12O4	[M-H2O-H]-	Benzene and substituted derivatives	1-hydroxy-2-unsubstituted benzenoids	C12205	Biosynthesis of other secondary metabolites; Global and overview maps	1782-47-4	HMDB0060398	MetaDNA	2	neg	1.73778e+07	5.42931e+06	7.80761e+06	4.7267e+06	6.52635e+06	5.68483e+06
M357T86	Loganate	357.117	86.5	376.137	4.22829	C16H24O10	[M-H2O-H]-	Carboxylic acids and derivatives	Alcohols and polyols	C01512	Global and overview maps; Metabolism of terpenoids and polyketides	22255-40-9		MetaDNA	2	neg	2.21368e+07	1.72197e+07	1.30647e+07	1.34435e+07	1.49583e+07	1.39139e+07
M101T54	2-Ketobutyric acid	101.023	53.8	102.032	1.1275	C4H6O3	[M-H]-	Keto acids and derivatives	Short-chain keto acids and derivatives	C00109	Carbohydrate metabolism; Amino acid metabolism; Global and overview maps	600-18-0	HMDB0000005	BioDeepDB	2	neg	1.18127e+08	8.5394e+07	1.05276e+08	1.12131e+08	1.12617e+08	1.05995e+08
M133T90	L-Aspartic acid	133.029	89.9	133.037	20.0842	C4H7NO4	[M]-	Carboxylic acids and derivatives	Amino acids, peptides, and analogues	C00049	Metabolism of cofactors and vitamins; Metabolism of other amino acids; Chemical structure transformation maps; Membrane transport; Signal transduction; Biosynthesis of other secondary metabolites; Signaling molecules and interaction; Translation; Amino acid metabolism; Energy metabolism; Cell motility; Global and overview maps	56-84-8	HMDB0000191	BioDeepDB	2	neg	2.74716e+07	1.95014e+07	1.94437e+07	1.83532e+07	1.89116e+07	1.84616e+07
M115T44	Fumaric acid	115.003	43.7	116.011	3.68685	C4H4O4	[M-H]-	Carboxylic acids and derivatives	Dicarboxylic acids and derivatives	C00122	Cancer: overview; Metabolism of cofactors and vitamins; Chemical structure transformation maps; Signal transduction; Endocrine system; Carbohydrate metabolism; Xenobiotics biodegradation and metabolism; Amino acid metabolism; Energy metabolism; Global and overview maps	110-17-8	HMDB0000134	BioDeepDB	2	neg	1.17368e+08	1.06459e+08	9.0313e+07	1.03832e+08	1.13508e+08	9.38954e+07
M116T486	5-Aminopentanoic acid	115.92	486.1	117.079	4.30089	C5H11NO2	[M-H]-	Carboxylic acids and derivatives	Amino acids, peptides, and analogues	C00431	Amino acid metabolism; Global and overview maps	660-88-8	HMDB0003355	BioDeepDB	2	neg	1.06091e+07	1.76222e+07	3.18761e+07	8.37385e+06	1.07063e+07	1.0034e+07
M117T439	L-Valine	116.928	439.3	117.079	4.58228	C5H11NO2	[M]-	Carboxylic acids and derivatives	Amino acids, peptides, and analogues	C00183	Cancer: overview; Metabolism of cofactors and vitamins; Metabolism of other amino acids; Membrane transport; Digestive system; Biosynthesis of other secondary metabolites; Translation; Amino acid metabolism; Chemical structure transformation maps; Global and overview maps	72-18-4	HMDB0000883	BioDeepDB	2	neg	1.38027e+08	1.17959e+08	2.87184e+07	1.21715e+08	2.6948e+07	2.6222e+07
M118T44	Succinic acid	118.022	43.8	118.027	5.58134	C4H6O4	[M]-	Carboxylic acids and derivatives	Dicarboxylic acids and derivatives	C00042	Cancer: overview; Metabolism of cofactors and vitamins; Chemical structure transformation maps; Signal transduction; Nervous system; Endocrine system; Carbohydrate metabolism; Xenobiotics biodegradation and metabolism; Amino acid metabolism; Energy metabolism; Global and overview maps	110-15-6	HMDB0000254	BioDeepDB	2	neg	5.49906e+06	3.61879e+06	3.93386e+06	3.33078e+06	3.46602e+06	2.32373e+06
M121T126	Phenylethylamine	121.028	126.3	121.089	1.08696	C8H11N	[M]-	Benzene and substituted derivatives	Phenethylamines	C05332	Amino acid metabolism; Global and overview maps	64-04-0	HMDB0012275	BioDeepDB	2	neg	3.58189e+07	1.81054e+07	1.84144e+07	1.99265e+07	1.76064e+07	2.25413e+07
M125T279	Caprylic acid	125.096	278.8	144.115	1.67871	C8H16O2	[M-H2O-H]-	Fatty Acyls	Fatty acids and conjugates	C06423	Lipid metabolism; Metabolism of cofactors and vitamins; Chemical structure transformation maps; Global and overview maps	124-07-2	HMDB0000482	BioDeepDB	2	neg	1.6895e+07	1.43397e+07	1.19888e+07	1.06094e+07	1.39559e+07	1.23168e+07
M130T562	L-Isoleucine	130.087	561.9	131.095	0.584223	C6H13NO2	[M-H]-	Carboxylic acids and derivatives	Amino acids, peptides, and analogues	C00407	Cancer: overview; Metabolism of other amino acids; Digestive system; Biosynthesis of other secondary metabolites; Infectious disease: bacterial; Translation; Amino acid metabolism; Chemical structure transformation maps; Global and overview maps	73-32-5	HMDB0000172	BioDeepDB	2	neg	1.04012e+07	1.02429e+08	4.85903e+07	1.05725e+07	9.82093e+07	7.74068e+07
M131T50	D-Asparagine	131.045	50	132.054	2.19837	C4H8N2O3	[M-H]-	Carboxylic acids and derivatives	Amino acids, peptides, and analogues	C01905		2058-58-4	HMDB0033780	BioDeepDB	2	neg	1.08956e+08	1.33457e+08	1.28424e+08	1.54404e+08	1.41232e+08	1.46122e+08
M133T140	L-Malic acid	133.014	140.1	134.022	1.68403	C4H6O5	[M-H]-	Hydroxy acids and derivatives	Beta hydroxy acids and derivatives	C00149	Cancer: overview; Chemical structure transformation maps; Signal transduction; Sensory system; Endocrine system; Excretory system; Carbohydrate metabolism; Cancer: specific types; Energy metabolism; Global and overview maps	97-67-6 / 6915-15-7	HMDB0000156	BioDeepDB	2	neg	4.24346e+06	1.01912e+06	1.22518e+06	4.22415e+06	5.20598e+06	5.67754e+06
M137T360	Salicylic acid	137.023	360.5	138.032	0.911336	C7H6O3	[M-H]-	Benzene and substituted derivatives	Benzoic acids and derivatives	C00805	Signal transduction; Digestive system; Xenobiotics biodegradation and metabolism; Metabolism of terpenoids and polyketides; Amino acid metabolism; Chemical structure transformation maps; Global and overview maps	69-72-7	HMDB0001895	BioDeepDB	2	neg	4.16068e+07	5.35149e+07	1.49885e+07	5.84012e+07	2.04688e+07	4.48712e+07
M137T172	3-Hydroxybenzoic acid	137.025	172.2	138.032	1.28444	C7H6O3	[M-H]-	Benzene and substituted derivatives	Benzoic acids and derivatives	C00587	Amino acid metabolism; Xenobiotics biodegradation and metabolism; Global and overview maps	99-06-9	HMDB0002466	BioDeepDB	2	neg	1.42986e+06	1.43889e+06	1.37627e+06	5.68311e+06	1.25806e+07	1.57363e+07
M137T483	4-Hydroxybenzoic acid	137.023	483	138.032	7.29802	C7H6O3	[M-H]-	Benzene and substituted derivatives	Benzoic acids and derivatives	C00156	Metabolism of cofactors and vitamins; Skeleton-based classification; Xenobiotics biodegradation and metabolism; Chemical structure transformation maps; Global and overview maps	99-96-7/456-23-5	HMDB0000500	BioDeepDB	2	neg	1.32782e+07	3.68537e+06	2.77579e+07	1.13616e+07	2.4006e+07	1.34708e+07
M163T339	Phenylpyruvic acid	163.039	338.8	164.047	1.24753	C9H8O3	[M-H]-	Benzene and substituted derivatives	Phenylpyruvic acid derivatives	C00166	Chemical structure transformation maps; Amino acid metabolism; Biosynthesis of other secondary metabolites; Global and overview maps	156-06-9	HMDB0000205	BioDeepDB	2	neg	6.69273e+06	4.71447e+06	8.70964e+06	1.39944e+06	6.77799e+06	9.03446e+06
M149T593	3-Methyladenine	149.009	593.5	149.07	4.55743	C6H7N5	[M]-	Imidazopyrimidines	Purines and purine derivatives	C00913		5142-23-4	HMDB0011600	BioDeepDB	2	neg	7.81923e+06	2.01533e+08	1.92491e+08	2.0639e+08	1.92413e+08	1.8311e+08
M150T552	D-Xylose	149.994	552.2	150.053	3.73111	C5H10O5	[M]-	Organooxygen compounds	Carbohydrates and carbohydrate conjugates	C00181	Carbohydrate metabolism; Membrane transport; Global and overview maps	58-86-6	HMDB0000098	BioDeepDB	2	neg	3.41785e+07	1.17514e+08	1.04106e+08	5.09893e+07	7.22192e+07	5.20063e+07
M151T256	2',4'-Dihydroxyacetophenone	151.039	255.6	152.047	4.13137	C8H8O3	[M-H]-	Benzene and substituted derivatives	Acetophenones	C03663		89-84-9	HMDB0029659	BioDeepDB	2	neg	1.54266e+07	1.924e+07	1.21203e+07	2.00318e+07	1.24043e+07	1.98466e+07
M151T52	D-Arabitol	151.06	52.5	152.069	0.616826	C5H12O5	[M-H]-	Organooxygen compounds	Carbohydrates and carbohydrate conjugates	C01904	Carbohydrate metabolism; Global and overview maps	488-82-4	HMDB0000568	BioDeepDB	2	neg	1.1291e+08	1.12608e+08	1.03592e+08	9.93314e+07	1.23515e+08	1.12078e+08
M175T149	Guanidinosuccinic acid	174.955	149.3	175.059	0.504176	C5H9N3O4	[M]-	Carboxylic acids and derivatives	Amino acids, peptides, and analogues	C03139		6133-30-8	HMDB0003157	BioDeepDB	2	neg	2.33805e+06	5.33678e+06	1.64484e+07	1.43038e+06	4.17075e+06	973577
M161T466	myo-Inositol	161.047	466.1	180.063	9.25199	C6H12O6	[M-H2O-H]-	Organooxygen compounds	Alcohols and polyols	C00137	Membrane transport; Signal transduction; Carbohydrate metabolism; Biosynthesis of other secondary metabolites; Global and overview maps	87-89-8/87-9-8	HMDB0000211	BioDeepDB	2	neg	1.58362e+07	2.61853e+07	3.39652e+07	2.08162e+07	2.3799e+07	1.68677e+07
M181T157	Sorbitol	181.005	156.7	182.079	1.96763	C6H14O6	[M-H]-	Organooxygen compounds	Carbohydrates and carbohydrate conjugates	C00794	Carbohydrate metabolism; Membrane transport; Global and overview maps	50-70-4	HMDB0000247	BioDeepDB	2	neg	3.39377e+06	4.53566e+06	3.55969e+06	3.90942e+06	3.93699e+06	3.92649e+06
M165T682	Phthalic acid	165.04	681.8	166.027	1.71575	C8H6O4	[M-H]-	Benzene and substituted derivatives	Benzoic acids and derivatives	C01606	Membrane transport; Xenobiotics biodegradation and metabolism; Global and overview maps	88-99-3 / 3198-29-6	HMDB0002107	BioDeepDB	2	neg	2.16641e+06	2.6325e+07	7.66092e+06	1.02389e+07	1.03505e+07	1.97013e+07
M187T640	Azelaic acid	187.095	639.9	188.105	4.42098	C9H16O4	[M-H]-	Fatty Acyls	Fatty acids and conjugates	C08261		123-99-9	HMDB0000784	BioDeepDB	2	neg	7.98538e+06	3.17989e+07	2.75726e+07	9.7607e+06	4.1093e+07	5.82763e+07
M181T463_2	Mannitol	181.072	463.2	182.079	3.18105	C6H14O6	[M-H]-	Organooxygen compounds	Carbohydrates and carbohydrate conjugates	C00392	Carbohydrate metabolism; Membrane transport; Global and overview maps	69-65-8	HMDB0000765	BioDeepDB	2	neg	5.68808e+06	1.58321e+06	1.21503e+07	1.48633e+06	5.33475e+06	7.7856e+06
M197T295	Syringic acid	197.045	295.1	198.053	4.56749	C9H10O5	[M-H]-	Benzene and substituted derivatives	Benzoic acids and derivatives	C10833	Xenobiotics biodegradation and metabolism; Global and overview maps	530-57-4	HMDB0002085	BioDeepDB	2	neg	2.52659e+07	2.05792e+07	2.15842e+07	1.83101e+07	2.03681e+07	2.04884e+07
M199T535	N-Acetylserotonin	199.169	535.2	218.106	0.651371	C12H14N2O2	[M-H2O-H]-	Indoles and derivatives	Hydroxyindoles	C00978	Amino acid metabolism; Global and overview maps	1210-83-9	HMDB0001238	BioDeepDB	2	neg	448662	1.85885e+06	2.08554e+06	2.69473e+06	2.80019e+06	2.48422e+06
M215T476	12-Hydroxydodecanoic acid	215.008	476.1	216.173	6.83944	C12H24O3	[M-H]-	Hydroxy acids and derivatives	Medium-chain hydroxy acids and derivatives	C08317		505-95-3	HMDB0002059	BioDeepDB	2	neg	2.32246e+06	7.6446e+06	2.58213e+07	9.81772e+06	2.21408e+06	6.66933e+06
M223T639	Thymidine	223.028	639.4	242.09	0.414221	C10H14N2O5	[M-H2O-H]-	Pyrimidine nucleosides	Pyrimidine 2'-deoxyribonucleosides	C00214	Global and overview maps; Nucleotide metabolism	50-89-5	HMDB0000273	BioDeepDB	2	neg	5.78488e+06	1.62159e+08	1.66028e+08	1.62701e+08	1.93928e+08	1.90911e+08
M227T596	Myristic acid	227.201	596.4	228.209	1.15209	C14H28O2	[M-H]-	Fatty Acyls	Fatty acids and conjugates	C06424	Lipid metabolism; Global and overview maps	544-63-8	HMDB0000806	BioDeepDB	2	neg	464222	1.24309e+07	1.21158e+07	1.51143e+07	1.56144e+07	1.23912e+07
M243T56	Uridine	243.062	56.4	244.07	0.96858	C9H12N2O6	[M-H]-	Pyrimidine nucleosides		C00299	Membrane transport; Global and overview maps; Nucleotide metabolism	58-96-8	HMDB0000296	BioDeepDB	2	neg	1.09646e+08	8.07064e+07	8.07017e+07	8.08616e+07	8.27303e+07	6.83354e+07
M269T651	Dehydroepiandrosterone	269.209	650.6	288.209	10.0521	C19H28O2	[M-H2O-H]-	Steroids and steroid derivatives	Androstane steroids	C01227	Cancer: overview; Endocrine system; Lipid metabolism; Xenobiotics biodegradation and metabolism; Cancer: specific types; Global and overview maps	53-43-0	HMDB0000077	BioDeepDB	2	neg	5.20828e+06	5.92728e+06	3.51203e+07	9.44837e+06	2.43036e+07	6.54236e+06
M283T676	Guanosine	283.264	675.8	283.092	1.50859	C10H13N5O5	[M]-	Purine nucleosides		C00387	Membrane transport; Global and overview maps; Nucleotide metabolism	118-00-3	HMDB0000133	BioDeepDB	2	neg	5.12307e+07	1.70809e+08	5.6498e+07	1.26548e+08	4.34446e+07	4.02514e+07
M297T672	Nonadecanoic acid	297.238	672.1	298.287	18.2576	C19H38O2	[M-H]-	Fatty Acyls	Fatty acids and conjugates	C16535		646-30-0	HMDB0000772	BioDeepDB	2	neg	1.3504e+06	2.3945e+06	5.5016e+06	7.57698e+06	1.282e+07	1.51764e+07
M299T561	all-trans-Retinoic acid	299.2	560.9	300.209	2.7022	C20H28O2	[M-H]-	Prenol lipids	Retinoids	C00777	Cancer: overview; Metabolism of cofactors and vitamins; Cancer: specific types; Immune system; Global and overview maps	302-79-4	HMDB0001852	BioDeepDB	2	neg	5.58405e+06	1.21781e+07	4.01406e+06	1.3942e+07	1.5086e+07	3.66463e+06
M309T635	Ribose 1,5-bisphosphate	309.173	634.7	309.986	3.98903	C5H12O11P2	[M-H]-	Organooxygen compounds	Carbohydrates and carbohydrate conjugates	C01151	Carbohydrate metabolism; Metabolism of other amino acids; Global and overview maps	14689-84-0	HMDB0011688	BioDeepDB	2	neg	2.14455e+06	2.61046e+07	7.59973e+06	2.35881e+06	3.92943e+06	4.08338e+06
M341T106	Trehalose	341.117	105.5	342.116	24.8478	C12H22O11	[M-H]-	Organooxygen compounds	Carbohydrates and carbohydrate conjugates	C01083	Carbohydrate metabolism; Membrane transport; Global and overview maps	99-20-7	HMDB0000975	BioDeepDB	2	neg	1.11141e+07	3.87451e+06	6.31612e+06	7.46618e+06	4.51223e+06	5.24597e+06
M339T688	Fructose 1,6-bisphosphate	339.199	688.1	339.996	3.35443	C6H14O12P2	[M-H]-	Organooxygen compounds	Carbohydrates and carbohydrate conjugates	C00354	Cancer: overview; Signal transduction; Endocrine system; Amino acid metabolism; Energy metabolism; Global and overview maps	488-69-7	HMDB0001058	BioDeepDB	2	neg	401083	3.57286e+06	615985	2.20809e+06	7.37561e+06	1.72584e+06
M425T510	Lanosterin	425.255	510.5	426.386	7.6062	C30H50O	[M-H]-	Prenol lipids	Triterpenoids	C01724	Lipid metabolism; Global and overview maps	79-63-0	HMDB0001251	BioDeepDB	2	neg	8487.45	1.68557e+06	835928	2.1927e+06	636754	1.5736e+06
M101T543	L-Erythrulose	101.024	543.4	120.042	0.0989865	C4H8O4	[M-H2O-H]-	Organooxygen compounds	Carbohydrates and carbohydrate conjugates	C02045		533-50-6/496-55-9	HMDB0006293	BioDeepDB	2	neg	1.09072e+07	1.253e+07	5.34213e+06	1.28056e+07	3.92015e+06	3.71337e+07
M121T642	4-Hydroxybenzaldehyde	121.028	641.9	122.037	8.26252	C7H6O2	[M-H]-	Organooxygen compounds	Carbonyl compounds	C00633	Chemical structure transformation maps; Xenobiotics biodegradation and metabolism; Global and overview maps	123-08-0	HMDB0011718	BioDeepDB	2	neg	4.07814e+06	1.35963e+07	2.47545e+07	5.22901e+07	2.47403e+07	6.67574e+07
M137T644	3,4-Dihydroxybenzaldehyde	137.023	643.6	138.032	8.02783	C7H6O3	[M-H]-	Benzene and substituted derivatives	Benzaldehydes	C16700	Chemical structure transformation maps; Biosynthesis of other secondary metabolites	139-85-5	HMDB0059965	BioDeepDB	2	neg	7.51465e+06	1.66171e+07	3.5529e+06	3.18012e+06	8.13194e+06	1.36116e+07
M138T338	4-Nitrophenol	138.019	338.4	139.027	6.69474	C6H5NO3	[M-H]-	Phenols	Nitrophenols	C00870	Xenobiotics biodegradation and metabolism; Global and overview maps	100-02-7	HMDB0001232	BioDeepDB	2	neg	1.98556e+07	1.11748e+07	1.57351e+07	1.59821e+07	1.36914e+07	2.06322e+07
M179T544	Alpha-D-Glucose	179.055	543.6	180.063	5.02638	C6H12O6	[M-H]-	Organooxygen compounds	Carbohydrates and carbohydrate conjugates	C00267	Carbohydrate metabolism; Chemical structure transformation maps; Global and overview maps; Excretory system	492-62-6	HMDB0003345	BioDeepDB	2	neg	1.77806e+06	1.66174e+06	1.21486e+07	9.3361e+06	6.81935e+06	1.81563e+07
M191T681	Scopoletin	191.031	681.2	192.042	21.986	C10H8O4	[M-H]-	Coumarins and derivatives	Hydroxycoumarins	C01752	Chemical structure transformation maps; Biosynthesis of other secondary metabolites; Global and overview maps	92-61-5	HMDB0034344	BioDeepDB	2	neg	4.87953e+07	2.65565e+07	3.4929e+07	1.44823e+07	1.6673e+07	2.87073e+07
M194T383	Zingerone	194.09	382.7	194.094	23.7004	C11H14O3	[M]-	Benzene and substituted derivatives	Phenols and derivatives	C17497		122-48-5	HMDB0032590	BioDeepDB	2	neg	4.09962e+06	2.0744e+06	2.93365e+06	2.88086e+06	2.56284e+06	2.25641e+06
M181T484	L-Iditol	181.071	483.5	182.079	3.44616	C6H14O6	[M-H]-	Organooxygen compounds	Carbohydrates and carbohydrate conjugates	C01507		488-45-9	HMDB0011632	BioDeepDB	2	neg	1.69078e+07	2.97702e+06	5.63309e+06	3.1741e+06	1.62514e+07	1.35802e+07
M295T469	17a-Ethynylestradiol	295.174	469	296.178	11.5186	C20H24O2	[M-H]-	Steroids and steroid derivatives	Estrane steroids	C07534		57-63-6	HMDB0001926	BioDeepDB	2	neg	1.93093e+06	369873	401099	529555	595666	353478
M279T680	Bovinic acid	279.231	680.3	280.24	6.53222	C18H32O2	[M-H]-	Fatty Acyls	Lineolic acids and derivatives	C04056	Lipid metabolism	2540-56-9	HMDB0003797	BioDeepDB	2	neg	6.2275e+06	1.85148e+07	1.07191e+07	5.99976e+06	2.49871e+07	5.92818e+06
M283T352	Glycitein	283.06	351.5	284.068	4.23938	C16H12O5	[M-H]-	Isoflavonoids	Isoflav-2-enes	C14536	Biosynthesis of other secondary metabolites; Global and overview maps	40957-83-3/NA	HMDB0005781	BioDeepDB	2	neg	1.18875e+07	6.14506e+06	6.88879e+06	7.43158e+06	7.09131e+06	6.46377e+06
M284T663	Stearic acid	284.266	662.9	284.272	18.2927	C18H36O2	[M]-	Fatty Acyls	Fatty acids and conjugates	C01530	Lipid metabolism; Chemical structure transformation maps; Sensory system	57-11-4/646-29-7	HMDB0000827	BioDeepDB	2	neg	3.84859e+06	5.32569e+06	6.48758e+06	2.06848e+06	8.60072e+06	1.70559e+07
M325T644	11-Dehydrocorticosterone	325.183	644.1	344.199	7.65723	C21H28O4	[M-H2O-H]-	Steroids and steroid derivatives	Hydroxysteroids	C05490	Lipid metabolism	72-23-1	HMDB0004029	BioDeepDB	2	neg	3.15941e+06	1.13146e+07	2.06975e+06	2.04049e+06	1.08761e+07	7.48579e+06
M423T689	Alpha-Tocotrienol	423.325	689.1	424.334	3.60007	C29H44O2	[M-H]-	Prenol lipids	Quinone and hydroquinone lipids	C14153	Metabolism of cofactors and vitamins; Global and overview maps	1721-51-3/58864-81-6	HMDB0006327	BioDeepDB	2	neg	1.52319e+07	1.93258e+07	1.15695e+07	1.85329e+07	1.9541e+07	9.61785e+06
M457T304	Amygdalin	457.169	303.7	457.158	22.9674	C20H27NO11	[M]-	Organooxygen compounds	Carbohydrates and carbohydrate conjugates	C08325	Metabolism of other amino acids; Global and overview maps	29883-15-6	HMDB0035030	BioDeepDB	2	neg	7.95509e+06	5.91409e+06	4.95266e+06	6.02133e+06	6.0532e+06	5.58637e+06
M465T572	Cholesterol sulfate	465.303	571.5	466.312	2.14914	C27H46O4S	[M-H]-	Steroids and steroid derivatives	Cholestane steroids	C18043	Lipid metabolism	1256-86-6	HMDB0000653	BioDeepDB	2	neg	1.78527e+06	3.16564e+06	3.88367e+06	8.33026e+06	5.46646e+06	3.93921e+06
M267T403	Formononetin	267.065	403.1	268.074	5.92689	C16H12O4	[M-H]-	Isoflavonoids	O-methylated isoflavonoids	C00858	Chemical structure transformation maps; Biosynthesis of other secondary metabolites; Global and overview maps	485-72-3	HMDB0005808	MoNA	2	neg	7.30959e+06	6.02115e+06	5.18819e+06	5.90544e+06	4.87283e+06	5.47097e+06
M289T161	Catechin	289.074	160.8	290.079	6.70359	C15H14O6	[M-H]-	Flavonoids	Flavans	C06562	Chemical structure transformation maps; Biosynthesis of other secondary metabolites; Global and overview maps	154-23-4	HMDB0002780	MoNA	2	neg	8.19541e+06	4.5337e+06	3.10828e+06	2.55034e+06	4.25713e+06	2.93406e+06
M151T512	L-Arabitol	151.061	512	152.069	3.29327	C5H12O5	[M-H]-	Organooxygen compounds	Carbohydrates and carbohydrate conjugates	C00532	Carbohydrate metabolism; Global and overview maps	7643-75-6	HMDB0001851	GNPS	2	neg	8.43719e+06	1.62085e+06	8.43526e+06	1.92846e+06	1.20224e+06	7.35296e+06
M179T536	D-Fructose	179.055	536.3	180.063	5.09398	C6H12O6	[M-H]-	Organooxygen compounds	Carbohydrates and carbohydrate conjugates	C00095	Endocrine and metabolic disease; Membrane transport; Sensory system; Digestive system; Carbohydrate metabolism; Global and overview maps	53188-23-1/87-81-0	HMDB0000660	MoNA	2	neg	2.95255e+06	1.25319e+07	1.35237e+07	3.14424e+06	1.12573e+07	3.27866e+06
M179T640	Theophylline	179.055	640	180.065	12.4208	C7H8N4O2	[M-H]-	Imidazopyrimidines	Purines and purine derivatives	C07130	Chemical structure transformation maps; Biosynthesis of other secondary metabolites; Global and overview maps	58-55-9	HMDB0001889	MoNA	2	neg	1.32125e+06	1.42222e+06	1.24559e+07	7.52505e+06	2.52863e+06	7.62824e+06
M241T623	Pentadecanoic acid	241.216	622.5	242.225	3.33393	C15H30O2	[M-H]-	Fatty Acyls	Fatty acids and conjugates	C16537		1002-84-2	HMDB0000826	MoNA	2	neg	200235	7.86588e+06	8.23639e+06	9.66262e+06	1.13241e+07	6.38146e+06
M281T500	Vaccenic acid	281.244	500.5	282.256	17.438	C18H34O2	[M-H]-	Fatty Acyls	Fatty acids and conjugates	C08367		693-72-1	HMDB0003231	MoNA	2	neg	7.9132e+06	7.8256e+06	5.14861e+06	1.91562e+07	5.41559e+06	3.74365e+07
M345T74	Aucubin	345.118	74.3	346.126	3.78504	C15H22O9	[M-H]-	Prenol lipids	Terpene glycosides	C09771		479-98-1/NA	HMDB0036562	MoNA	2	neg	1.68297e+08	1.33749e+08	1.10848e+08	1.01879e+08	1.18535e+08	9.61969e+07
M161T302	4-Hydroxycoumarin	161.024	302.4	162.032	0.77007	C9H6O3	[M-H]-	Endogenous Metabolites		C20414		1076-38-6		mzCloud	2	neg	2.19025e+07	1.15255e+07	1.37391e+07	1.48483e+07	1.3409e+07	1.33837e+07
M179T282	Isopropylparaben	179.07	281.7	180.079	5.15998	C10H12O3	[M-H]-	Extractables/Leachables		C20343		4191-73-5		mzCloud	2	neg	2.56501e+07	1.83373e+07	1.61883e+07	1.81804e+07	2.02938e+07	1.87607e+07
M249T253	Citrinin	249.079	252.7	250.084	8.73618	C13H14O5	[M-H]-	Benzopyrans		C16765		518-75-2	HMDB0041857	mzCloud	2	neg	7.01326e+07	4.11541e+07	3.83374e+07	5.43194e+07	4.24811e+07	3.77054e+07
M515T102	Isochlorogenic acid b	515.117	102.4	516.127	4.12333	C25H24O12	[M-H]-	Alcohols and polyols	Cyclic alcohols and derivatives	C10468		14534-61-3	HMDB0030705	mzCloud	2	neg	9.47271e+06	7.23023e+06	6.90844e+06	5.17417e+06	7.08796e+06	6.91646e+06
